# Supplementary material for: The thermofluoric behavior of poly(fluorenetolyldiphenylamine)–oxadiazole pair in a polymer matrix
Source: Royal Society of Chemistry journal article supplement (doi:10.1039/c3ra42408a), 2013-01-01
Supplement: c3ra42408a.pdf [file c3ra42408a.pdf]

## Supporting Information

### The Thermofluoric Behavior of Poly(fluorenetolyldiphenylamine)-Oxadiazole Pair in Polymer Matrix.

Chin-Sheng Lee,<sup>†</sup> Cheng-Po Kuo,<sup>†</sup> Chiou-Ling Chang,<sup>†</sup> Ching-Nan Chuang,<sup>‡</sup> Mandy M. Lee,<sup>#</sup> Shih-Sheng Sun,<sup>#</sup> and Man-kit Leung<sup>\*,†,‡</sup>

\*Correspondence to: Man-kit Leung (E-mail: [mkleung@ntu.edu.tw](mailto:mkleung@ntu.edu.tw))

<sup>†</sup> Department of Chemistry, National Taiwan University, 1 Roosevelt Road Section 4, Taipei, Taiwan 10617, ROC. <sup>‡</sup> Institute of Polymer Science and Engineering, National Taiwan University. <sup>#</sup> Institute of Chemistry, Academia Sinica, Nankang, Taipei 115, Taiwan, ROC.

|                                                                             |     |
|-----------------------------------------------------------------------------|-----|
| Contents of Supporting Information.....                                     | S1  |
| <b>Supporting Fig S1.</b> <sup>1</sup> H NMR Spectrum of <b>1</b> .....     | S3  |
| <b>Supporting Fig S2.</b> <sup>13</sup> C NMR Spectrum of <b>1</b> .....    | S4  |
| <b>Supporting Fig S3.</b> <sup>1</sup> H NMR Spectrum of <b>2</b> .....     | S5  |
| <b>Supporting Fig S4.</b> <sup>13</sup> C NMR Spectrum of <b>2</b> .....    | S6  |
| <b>Supporting Fig S5.</b> <sup>1</sup> H NMR Spectrum of <b>PFT</b> .....   | S7  |
| <b>Supporting Fig S6.</b> <sup>1</sup> H NMR Spectrum of <b>3</b> .....     | S8  |
| <b>Supporting Fig S7.</b> <sup>13</sup> C NMR Spectrum of <b>3</b> .....    | S9  |
| <b>Supporting Fig S8.</b> <sup>1</sup> H NMR Spectrum of <b>4</b> .....     | S10 |
| <b>Supporting Fig S9.</b> <sup>13</sup> C NMR Spectrum of <b>4</b> .....    | S11 |
| <b>Supporting Fig S10.</b> <sup>1</sup> H NMR Spectrum of <b>5</b> .....    | S12 |
| <b>Supporting Fig S11.</b> <sup>13</sup> C NMR Spectrum of <b>5</b> .....   | S13 |
| <b>Supporting Fig S12.</b> <sup>1</sup> H NMR Spectrum of <b>6</b> .....    | S14 |
| <b>Supporting Fig S13.</b> <sup>13</sup> C NMR Spectrum of <b>6</b> .....   | S15 |
| <b>Supporting Fig S14.</b> <sup>1</sup> H NMR Spectrum of <b>7</b> .....    | S16 |
| <b>Supporting Fig S15.</b> <sup>13</sup> C NMR Spectrum of <b>7</b> .....   | S17 |
| <b>Supporting Fig S16.</b> <sup>1</sup> H NMR Spectrum of <b>8</b> .....    | S18 |
| <b>Supporting Fig S17.</b> <sup>13</sup> C NMR Spectrum of <b>8</b> .....   | S19 |
| <b>Supporting Fig S18.</b> <sup>1</sup> H NMR Spectrum of <b>NOXD</b> ..... | S20 |

|                                                                                                      |     |
|------------------------------------------------------------------------------------------------------|-----|
| <b>Supporting Fig S19.</b> $^{13}\text{C}$ NMR Spectrum of <b>NOXD</b> .....                         | S21 |
| <b>Supporting Fig S20.</b> Theoretical UV-Vis spectral analysis of <b>NOXD</b> .....                 | S22 |
| <b>Supporting Fig S21</b> Cyclic voltammograms of <b>NOXD</b> .....                                  | S23 |
| <b>Supporting Fig S22.</b> Cyclic voltammograms of <b>PFT</b> .....                                  | S23 |
| <b>Supporting Fig S23.</b> Time-resolved photoluminescence measurements of the <b>NOXD:PFT</b> ..... | S24 |

### Supporting Figure S1. $^1\text{H}$ NMR Spectrum of **1**

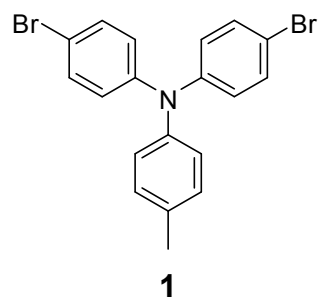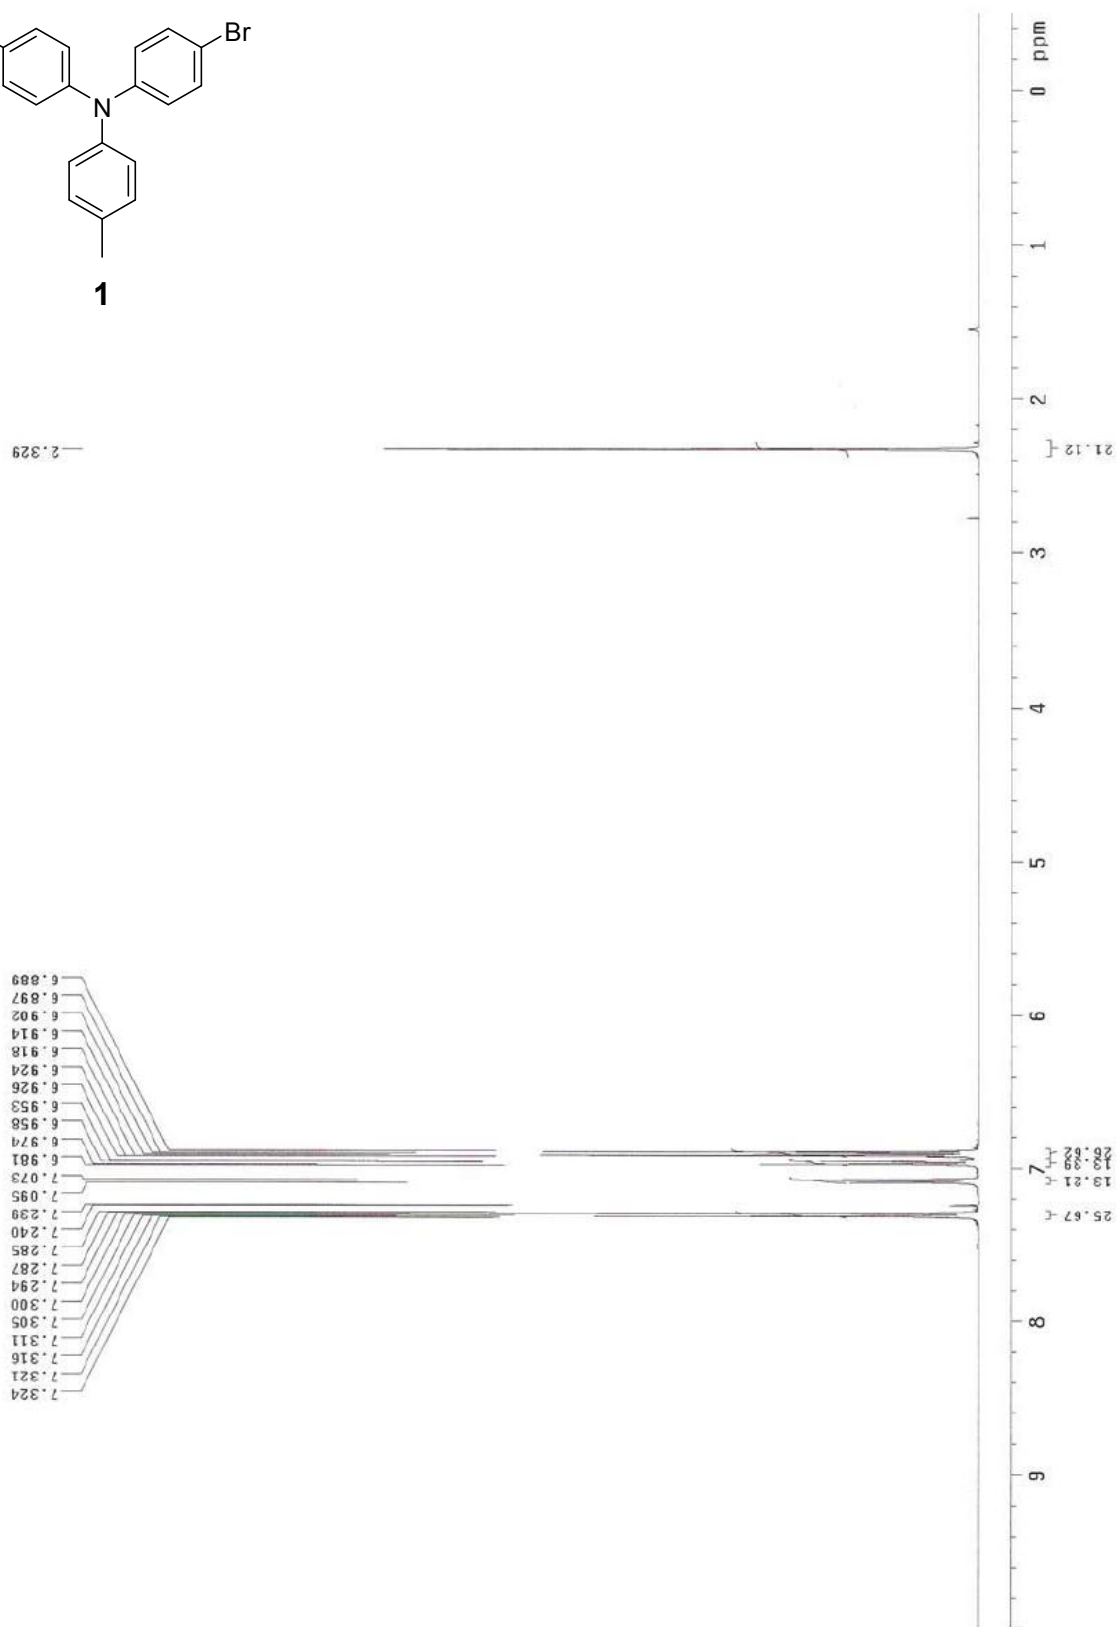

### Supporting Figure S2. $^{13}\text{C}$ NMR Spectrum of **1**

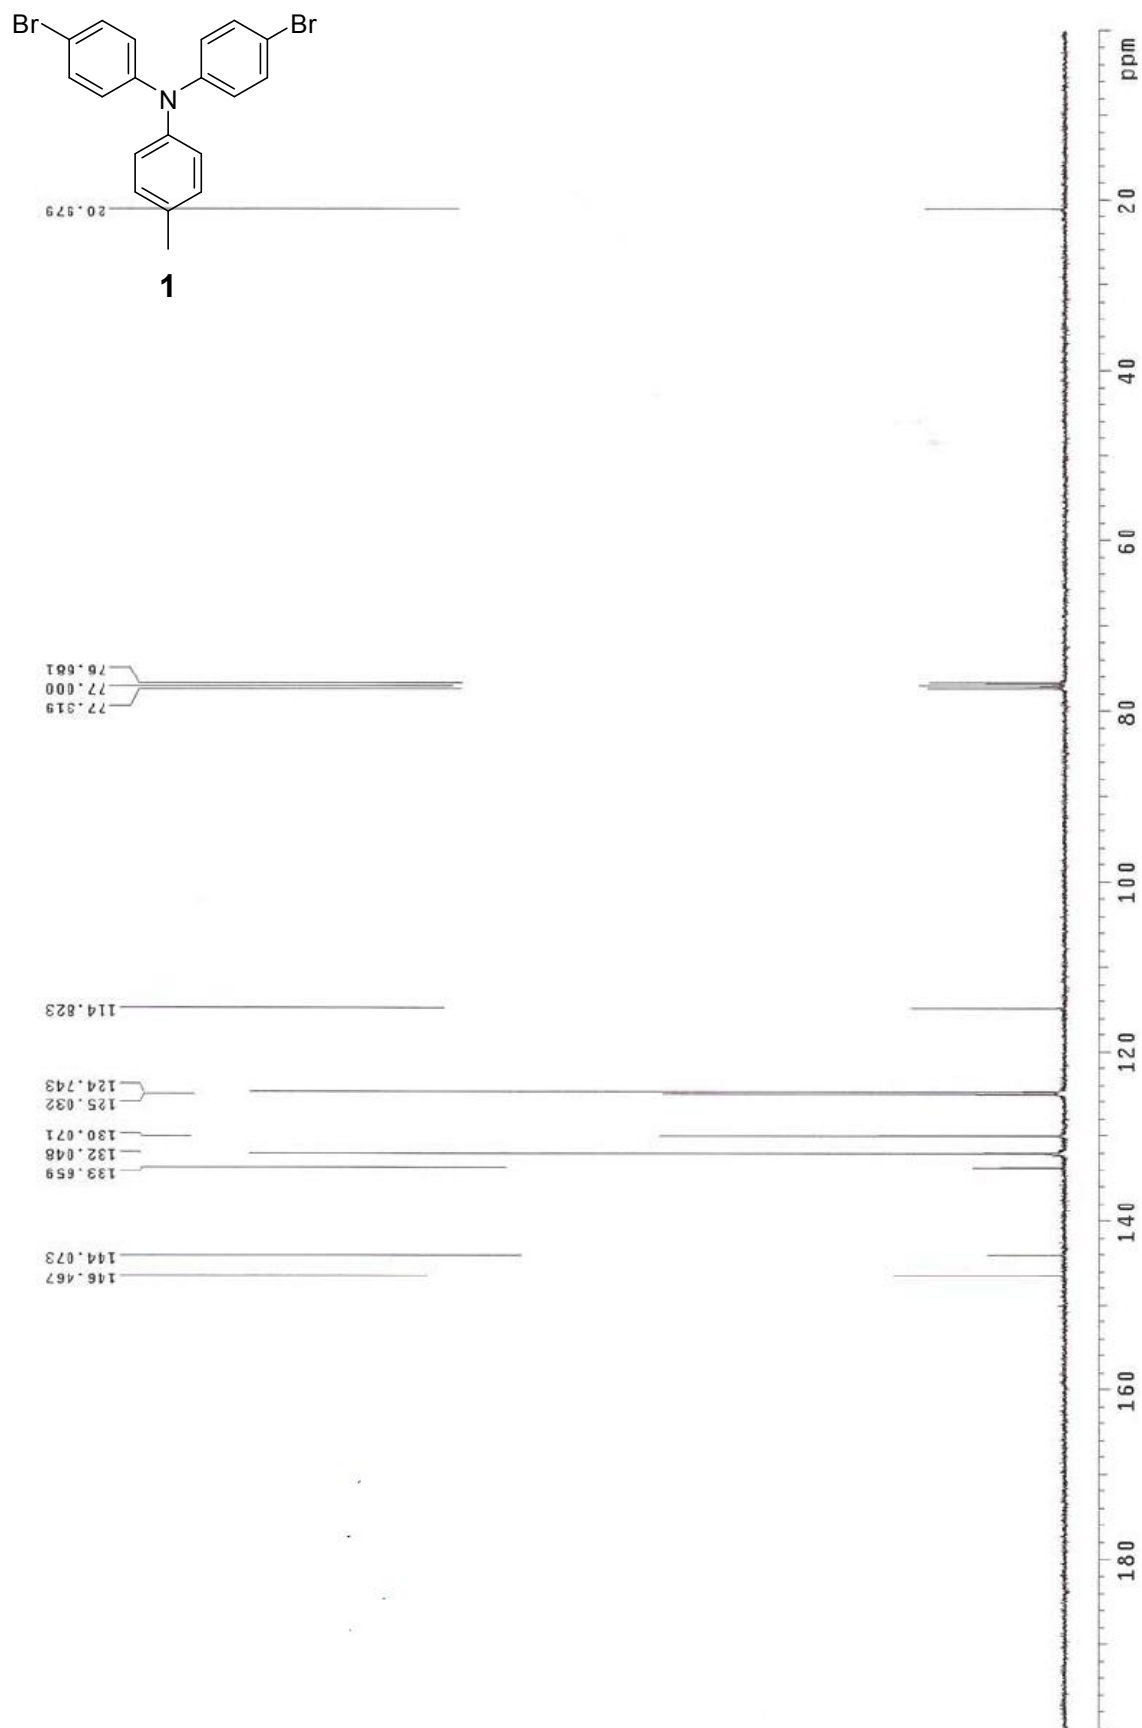

### Supporting Figure S3. $^1\text{H}$ NMR Spectrum of 2

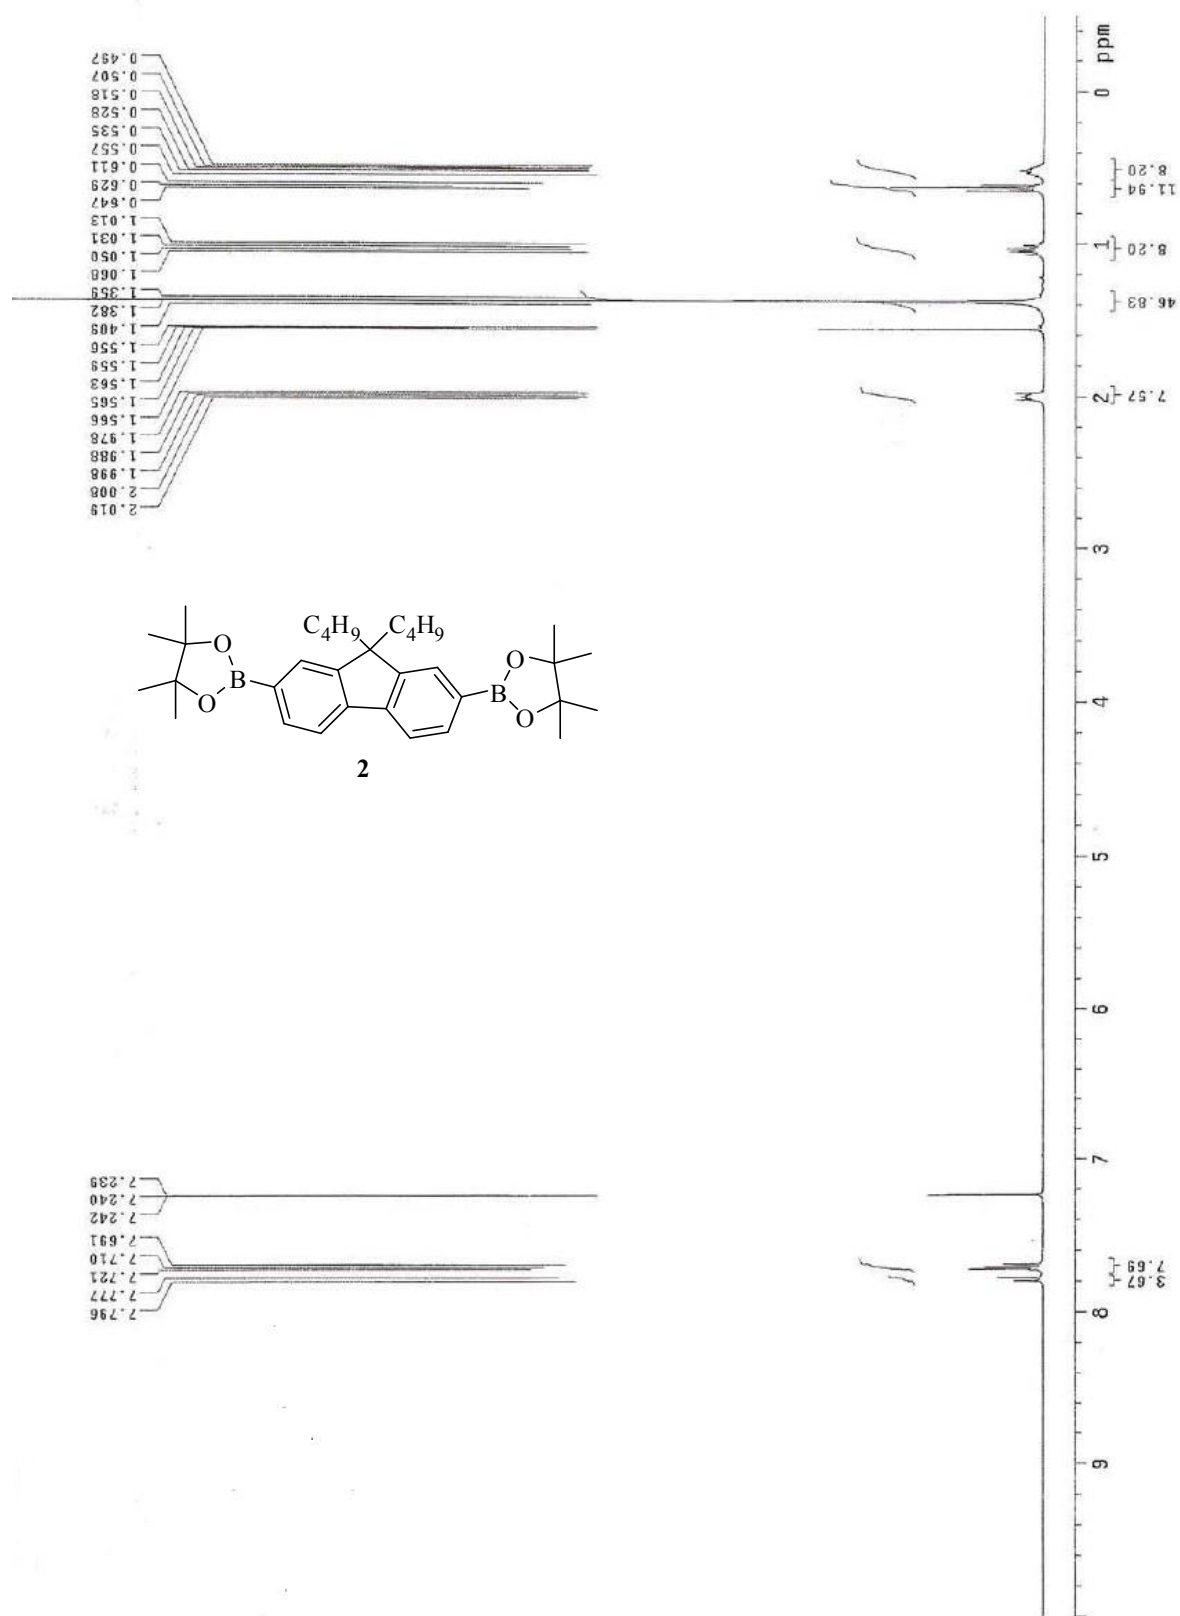

### Supporting Figure S4. $^{13}\text{C}$ NMR Spectrum of **2**

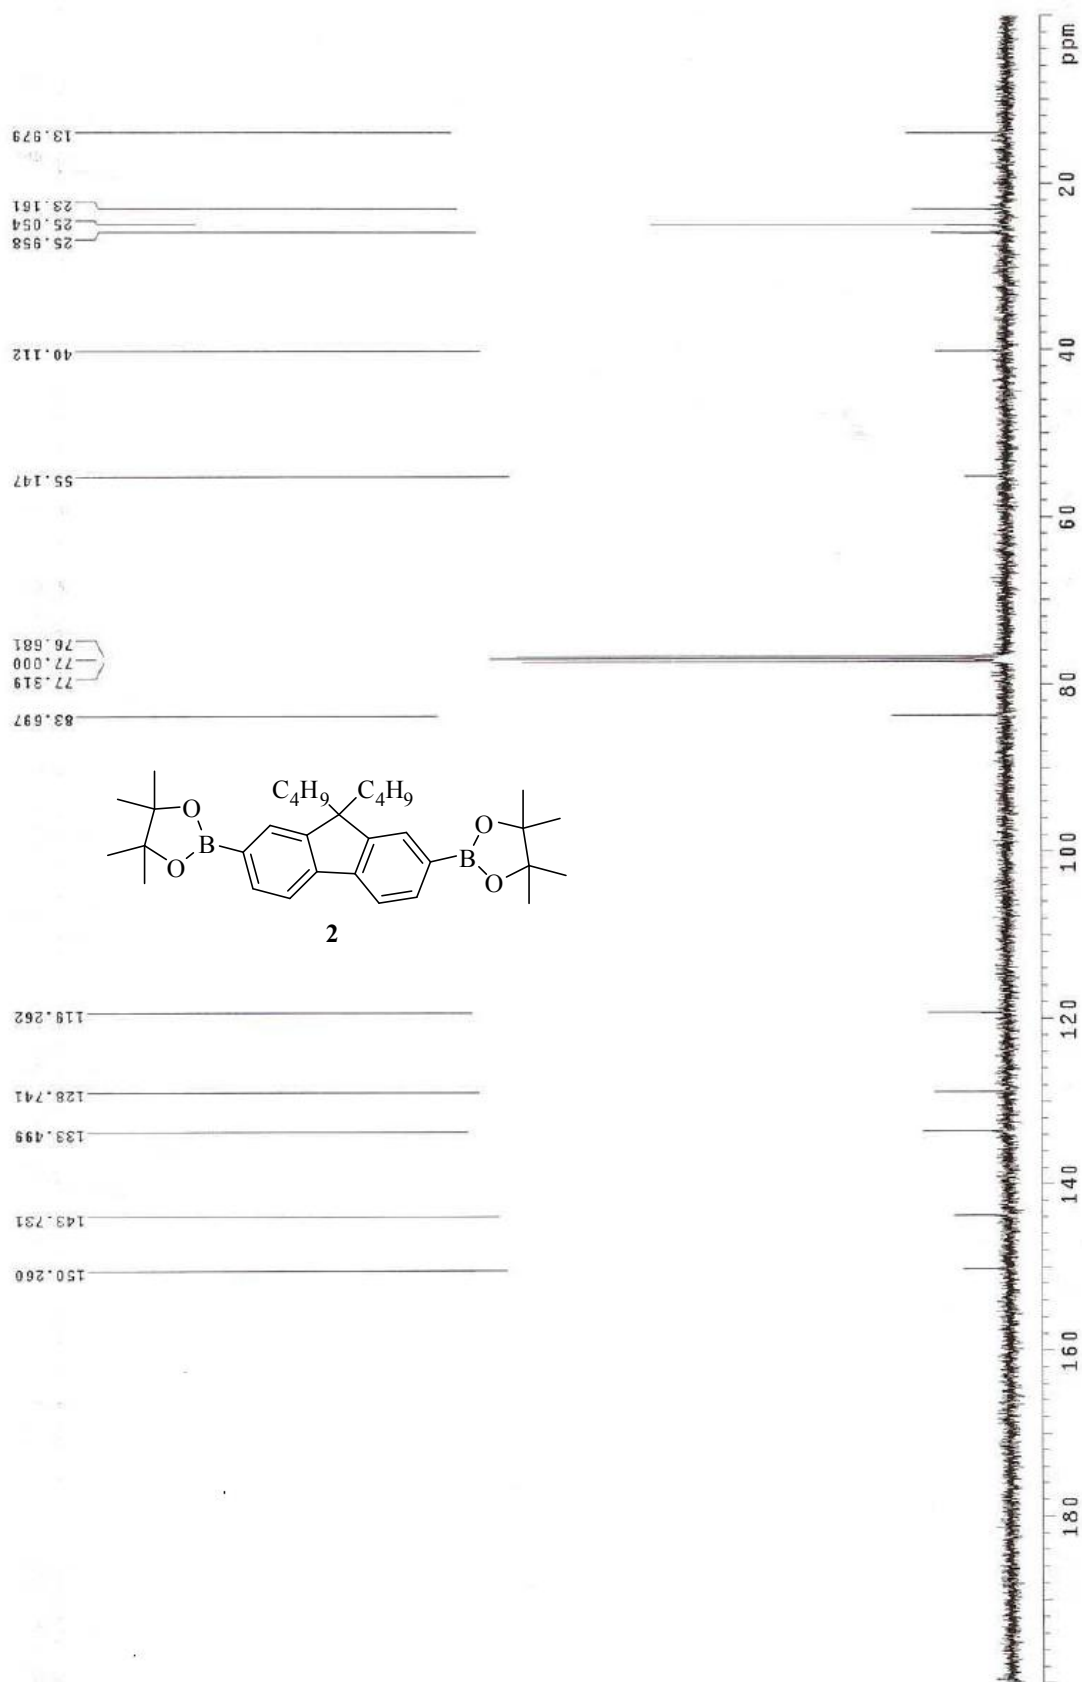

### Supporting Figure S5. $^1\text{H}$ NMR Spectrum of PFT

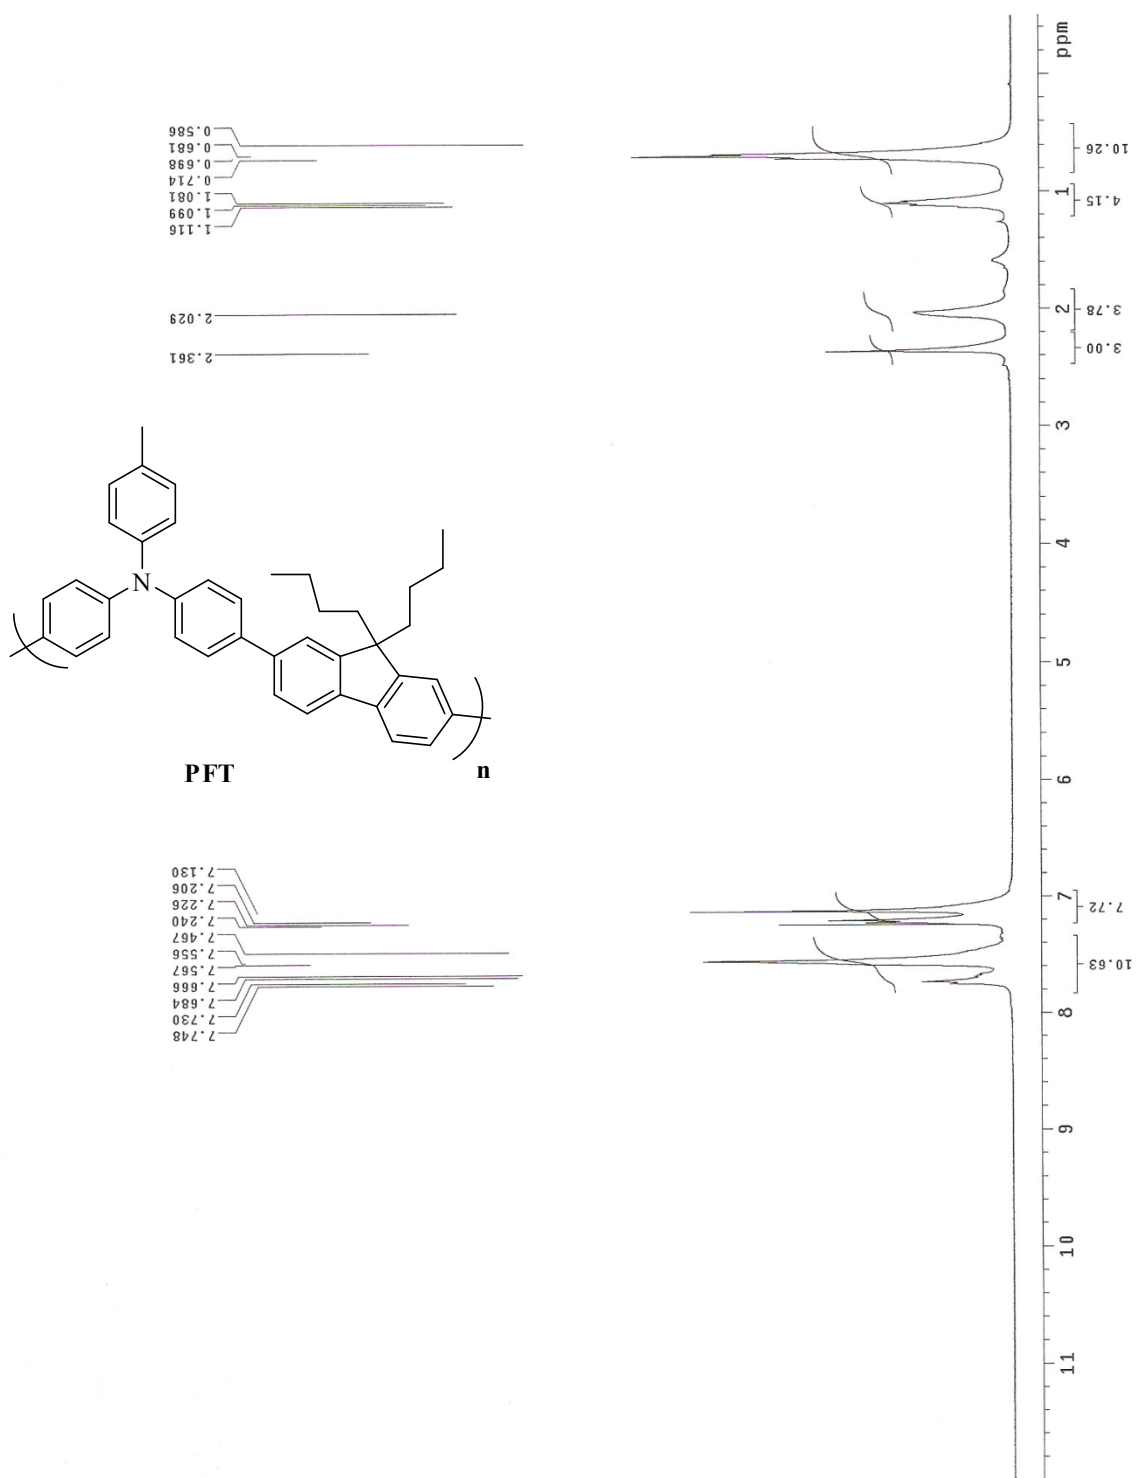

### Supporting Figure S6. <sup>1</sup>H NMR Spectrum of 3

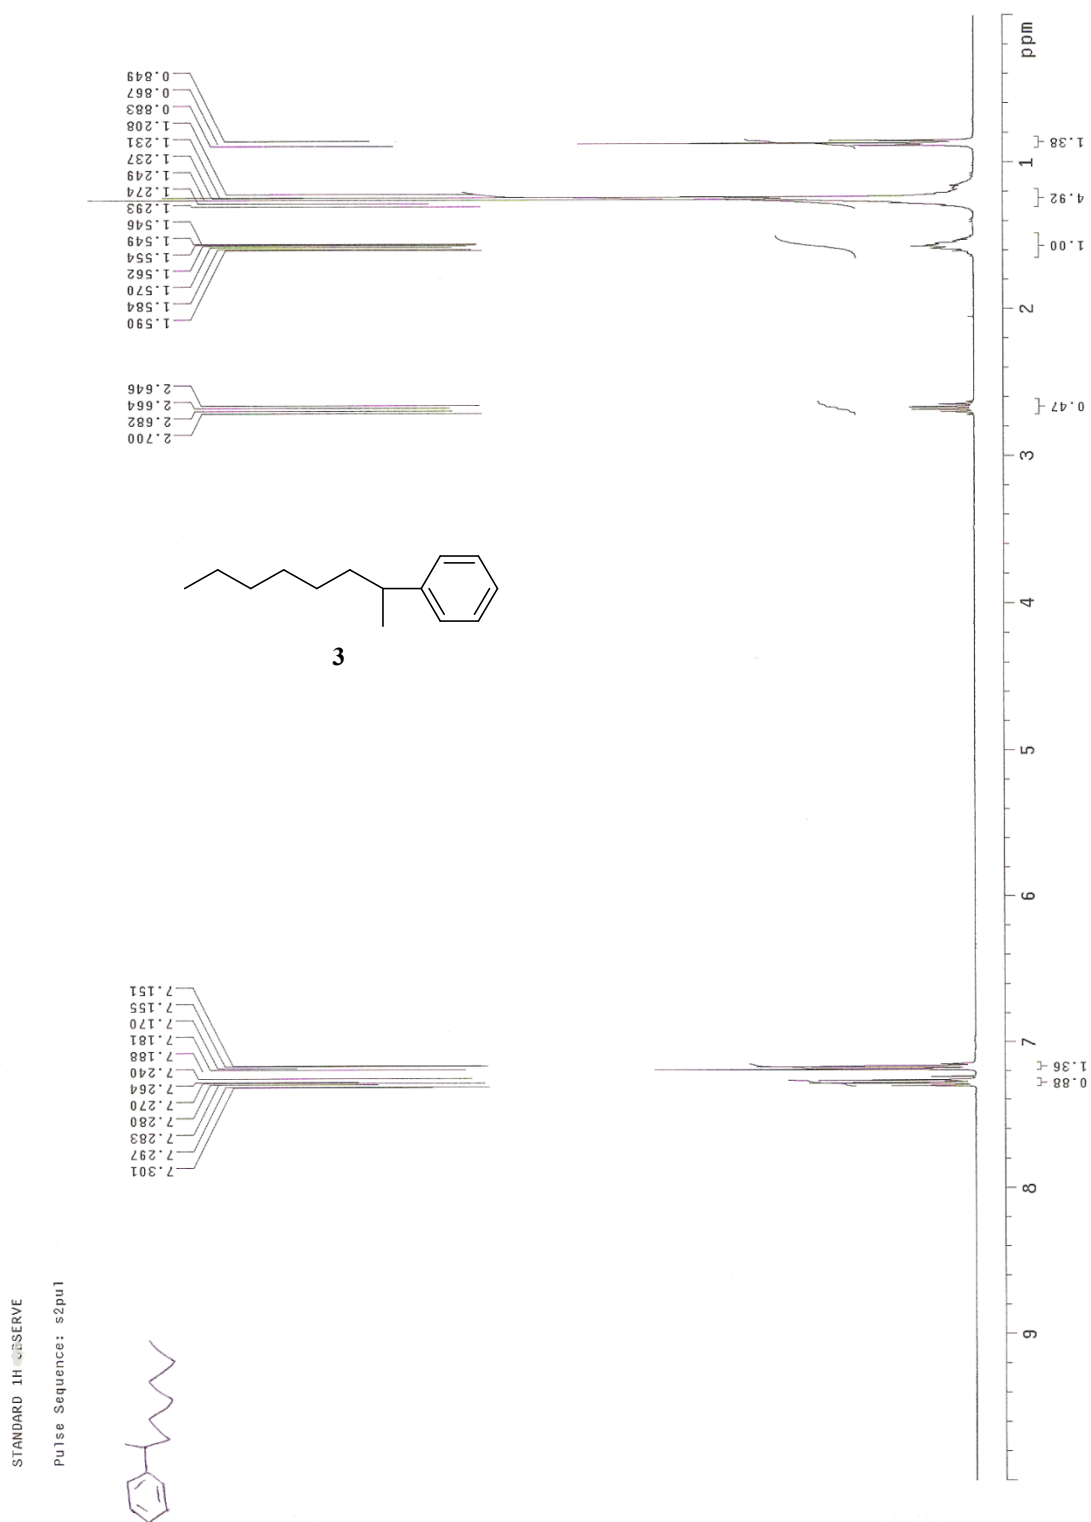



### Supporting Figure S7. <sup>13</sup>C NMR Spectrum of 3

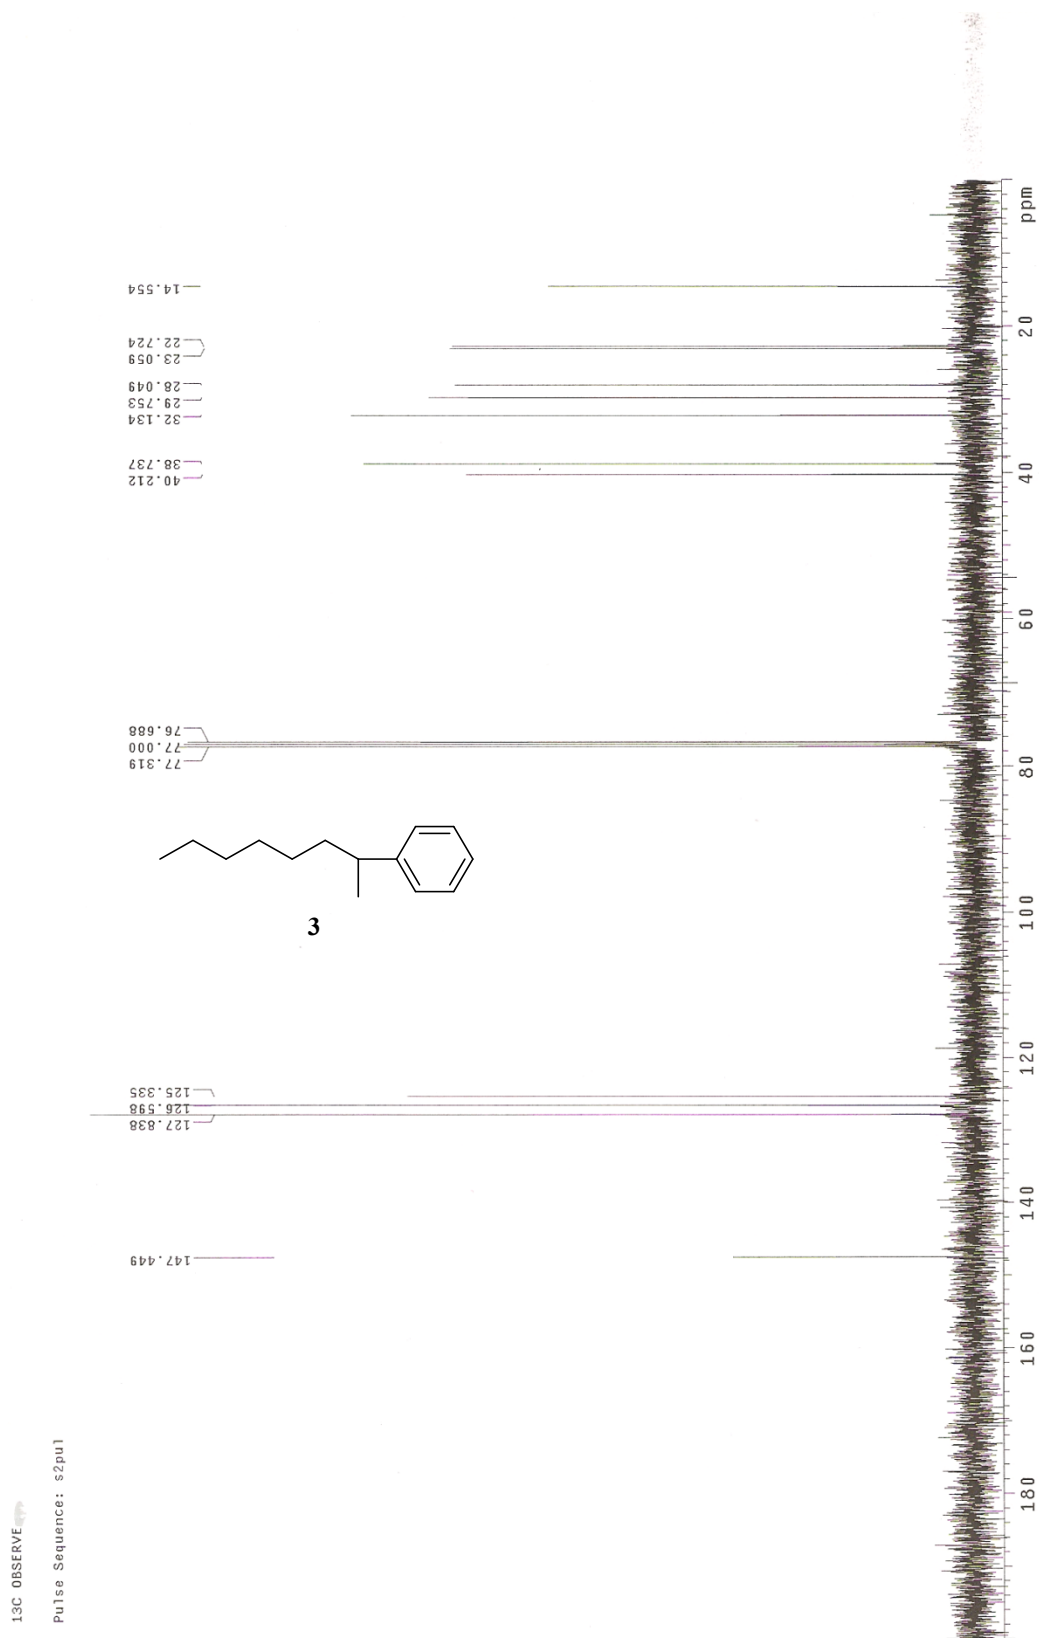

### Supporting Figure S8. <sup>1</sup>H NMR Spectrum of 4

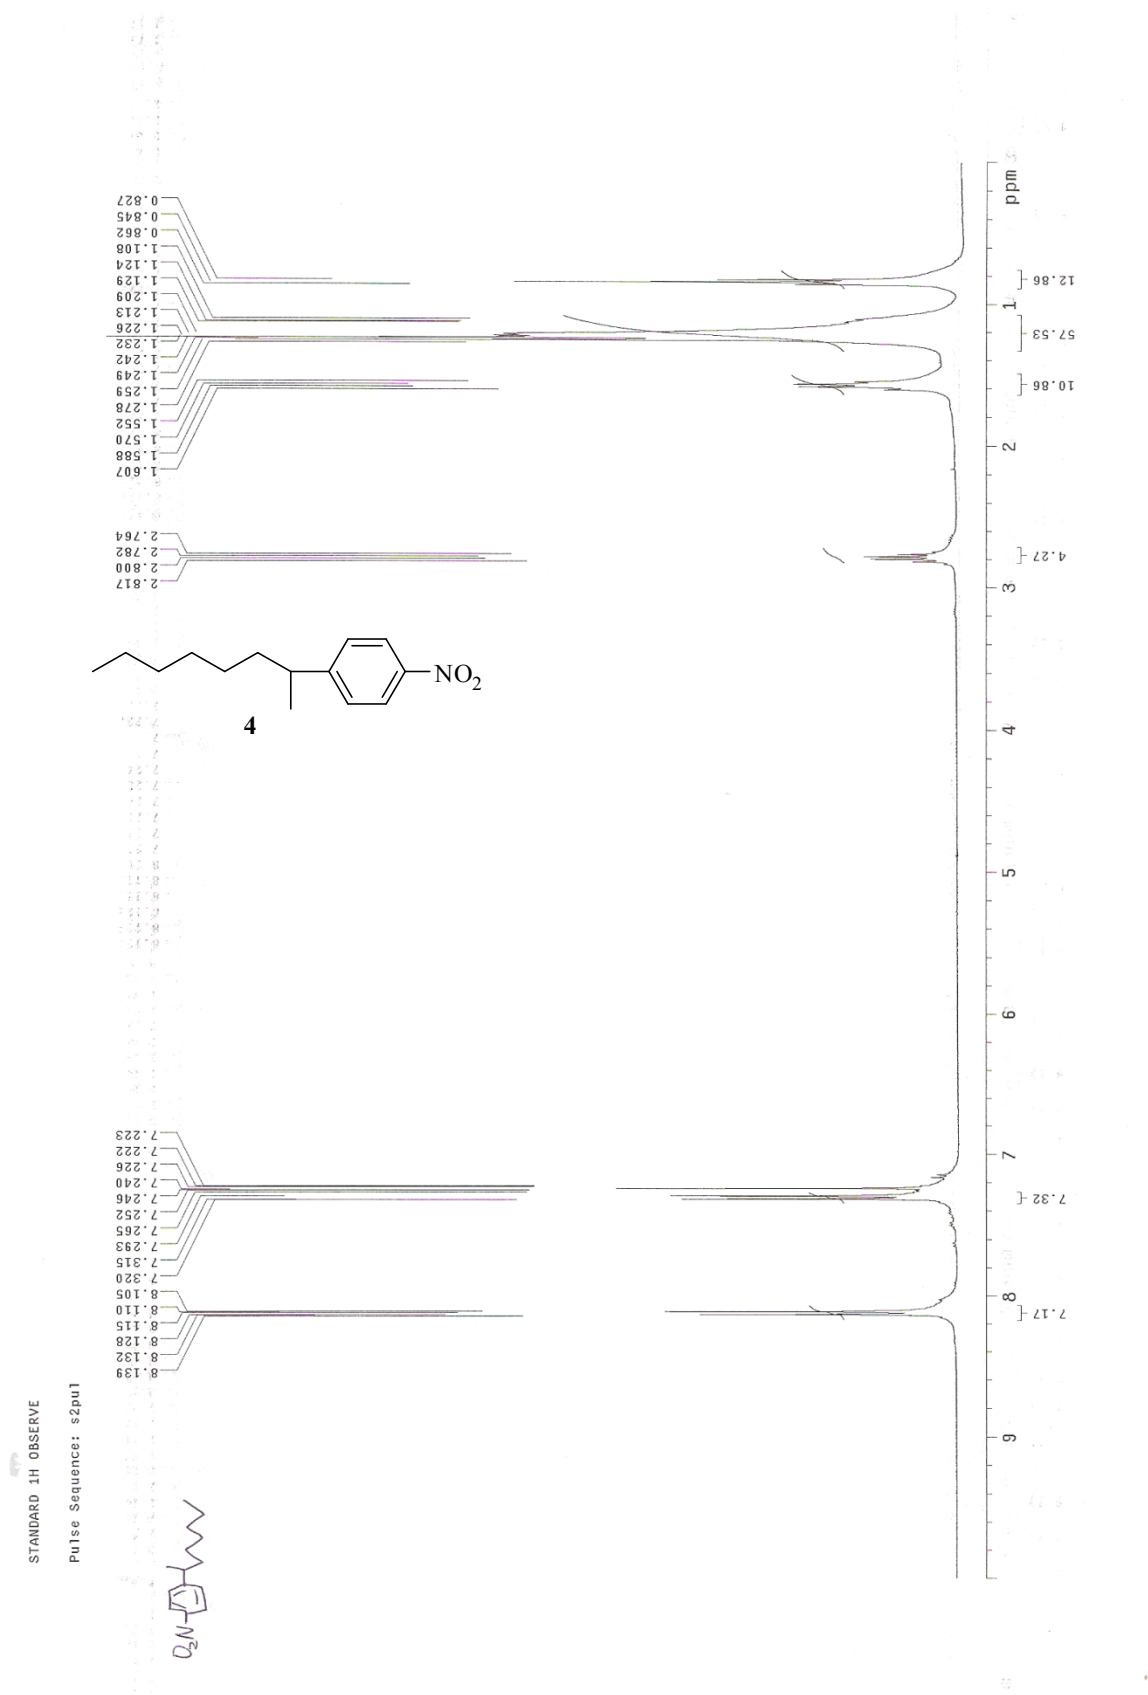

### Supporting Figure S9. $^{13}\text{C}$ NMR Spectrum of **4**

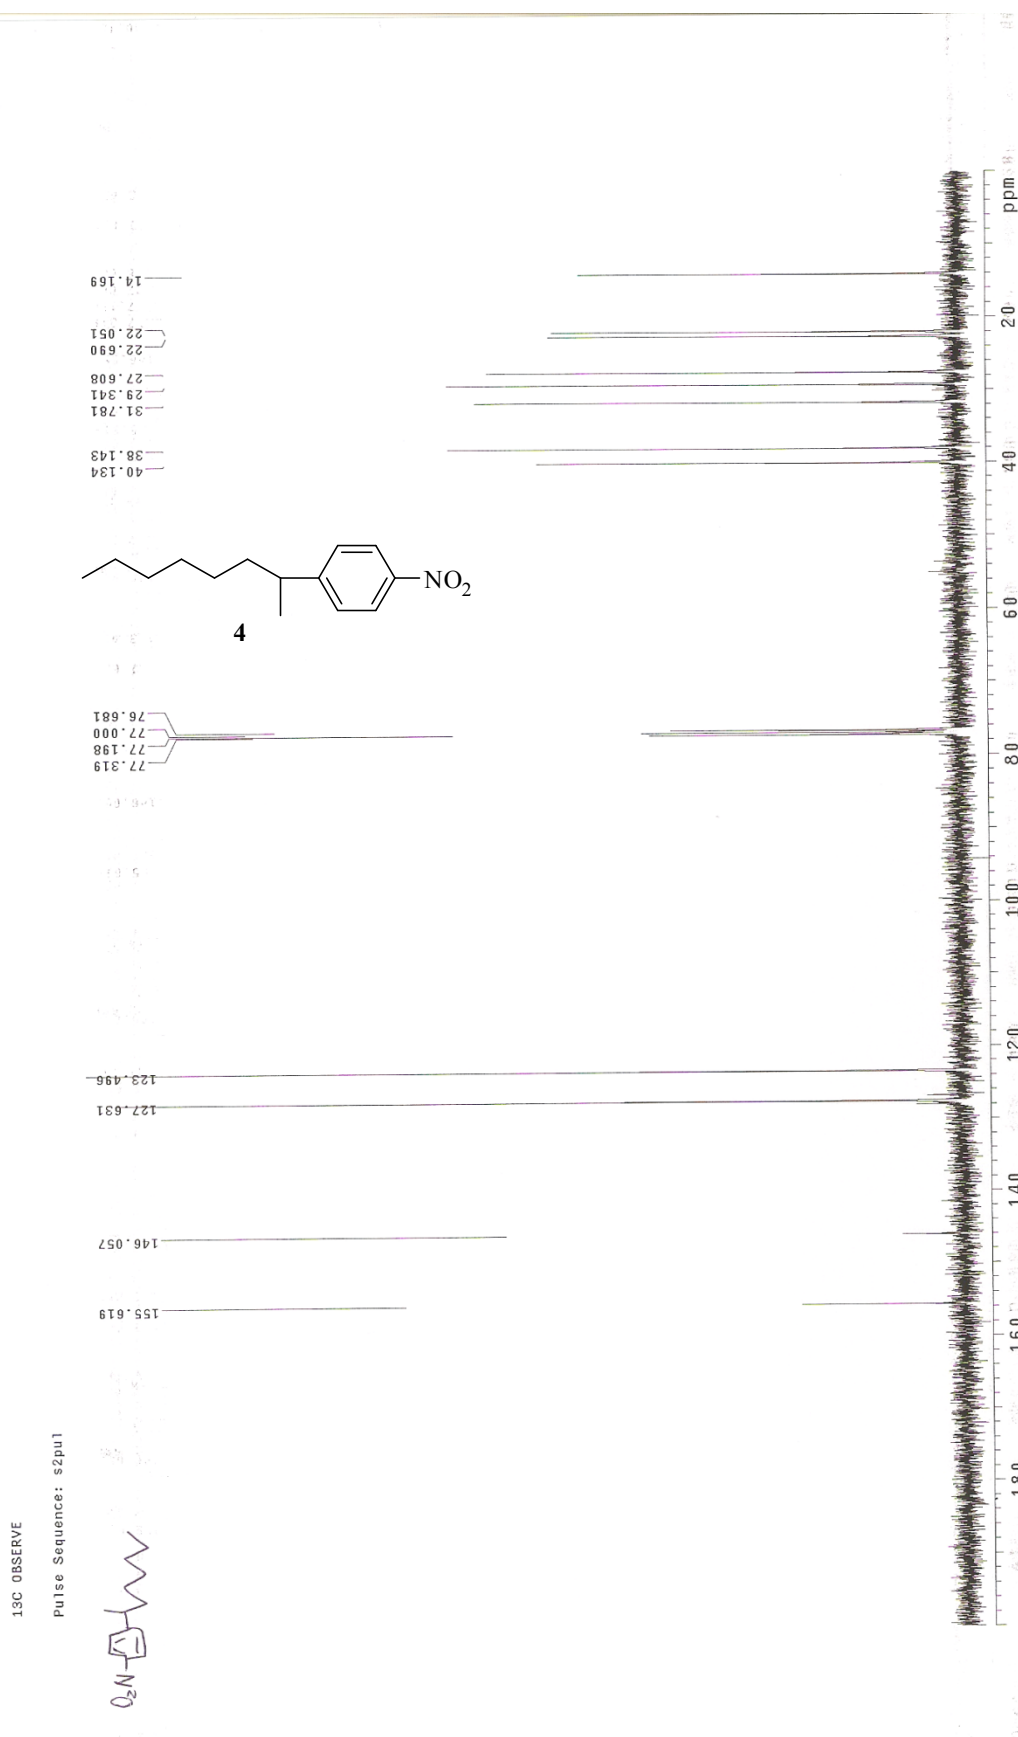

### Supporting Figure S10. <sup>1</sup>H NMR Spectrum of 5

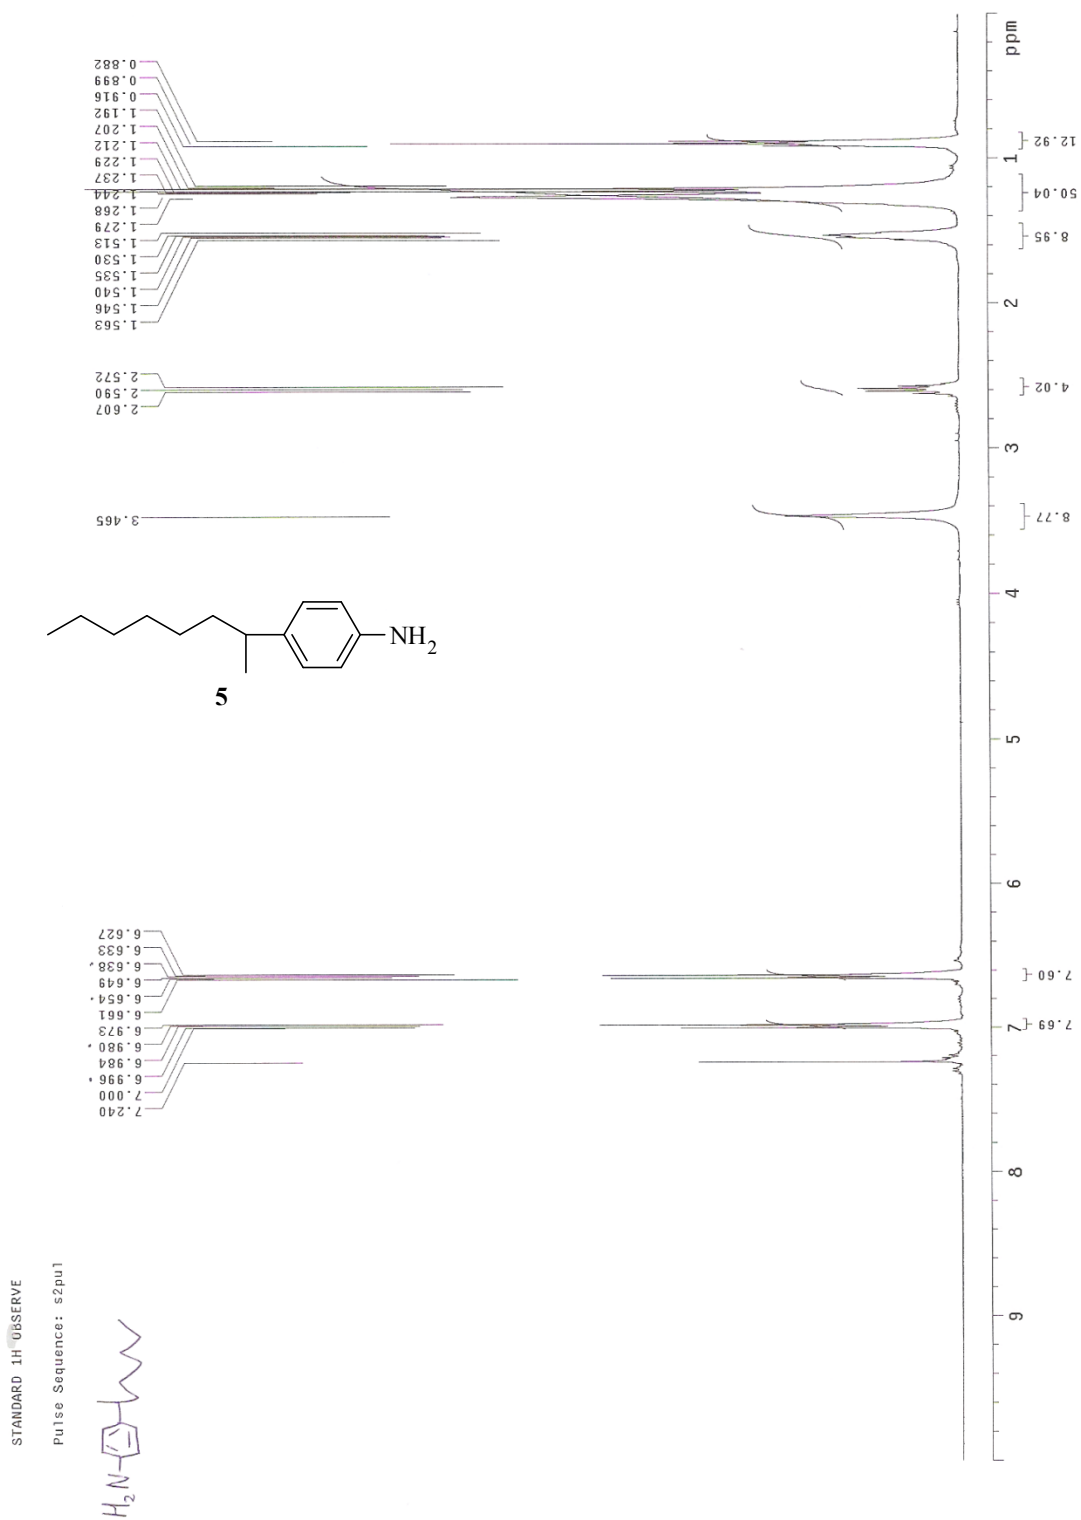

### Supporting Figure S11. $^{13}\text{C}$ NMR Spectrum of 5

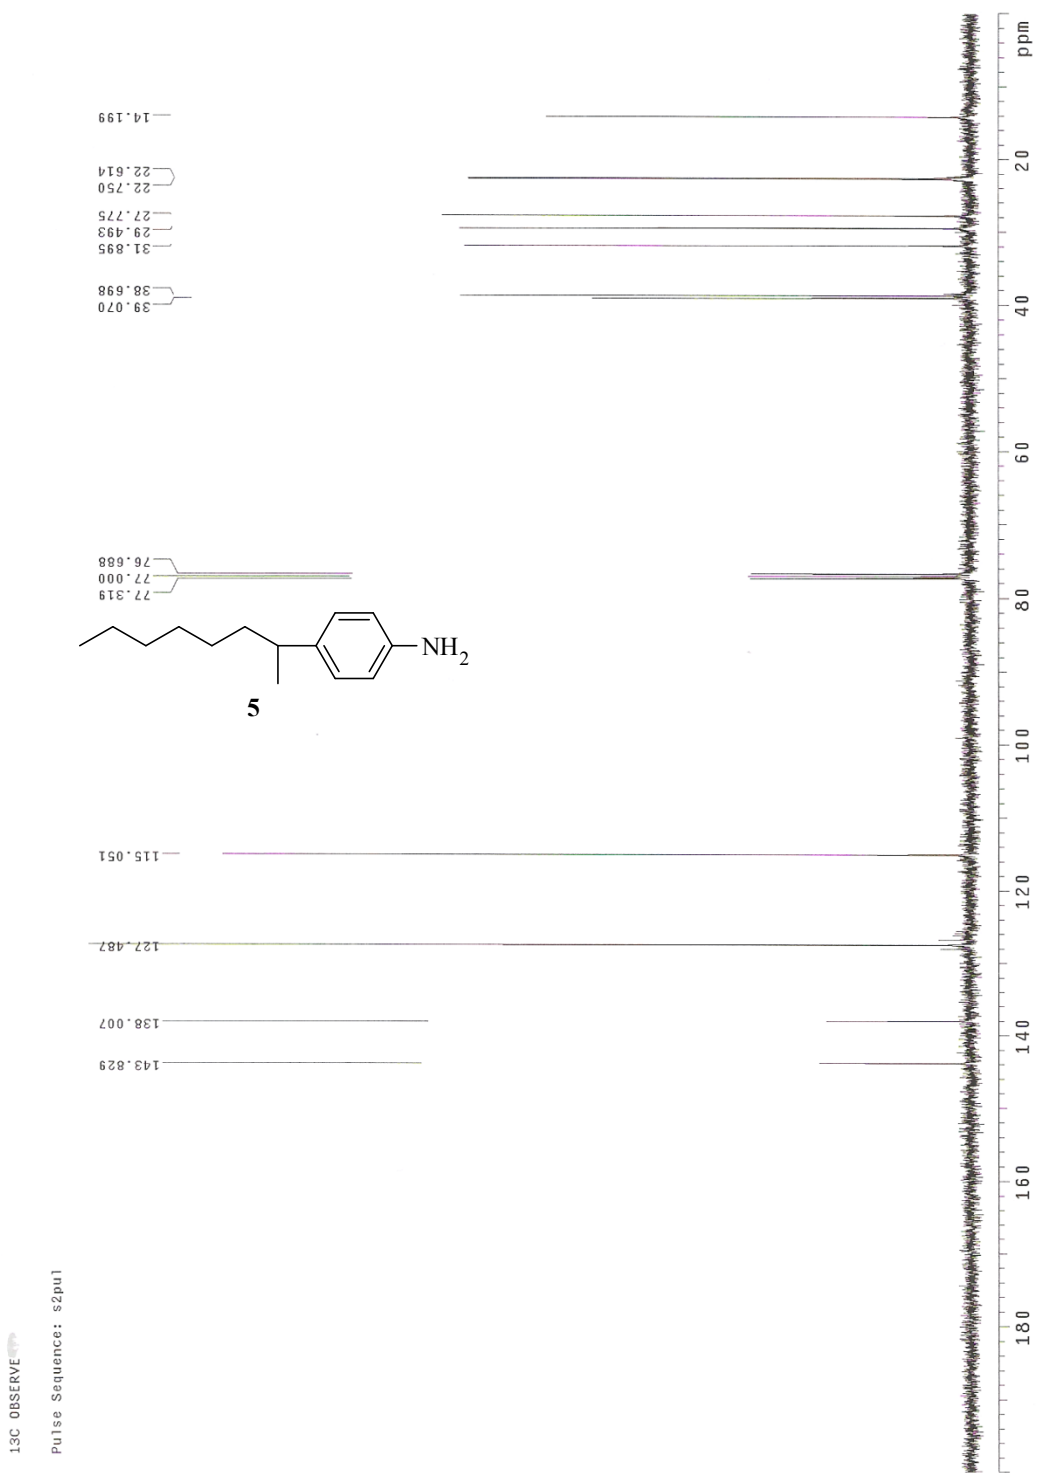

### Supporting Figure S12. <sup>1</sup>H NMR Spectrum of 6

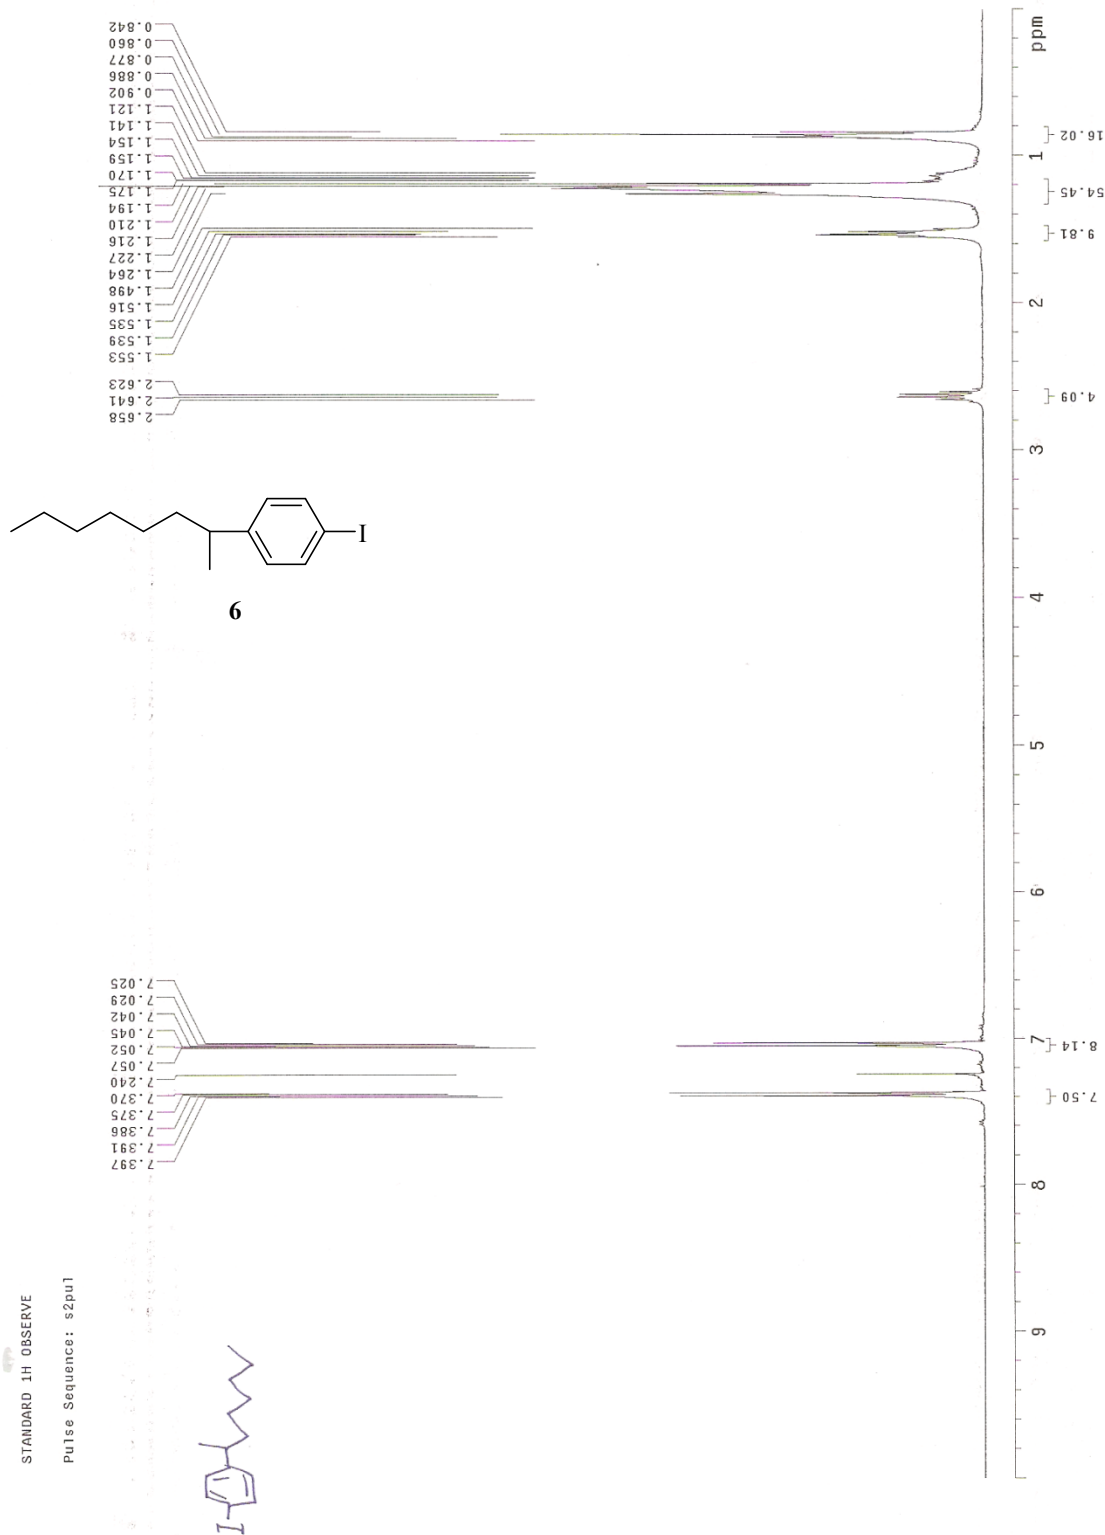

### Supporting Figure S13. <sup>13</sup>C NMR Spectrum of 6

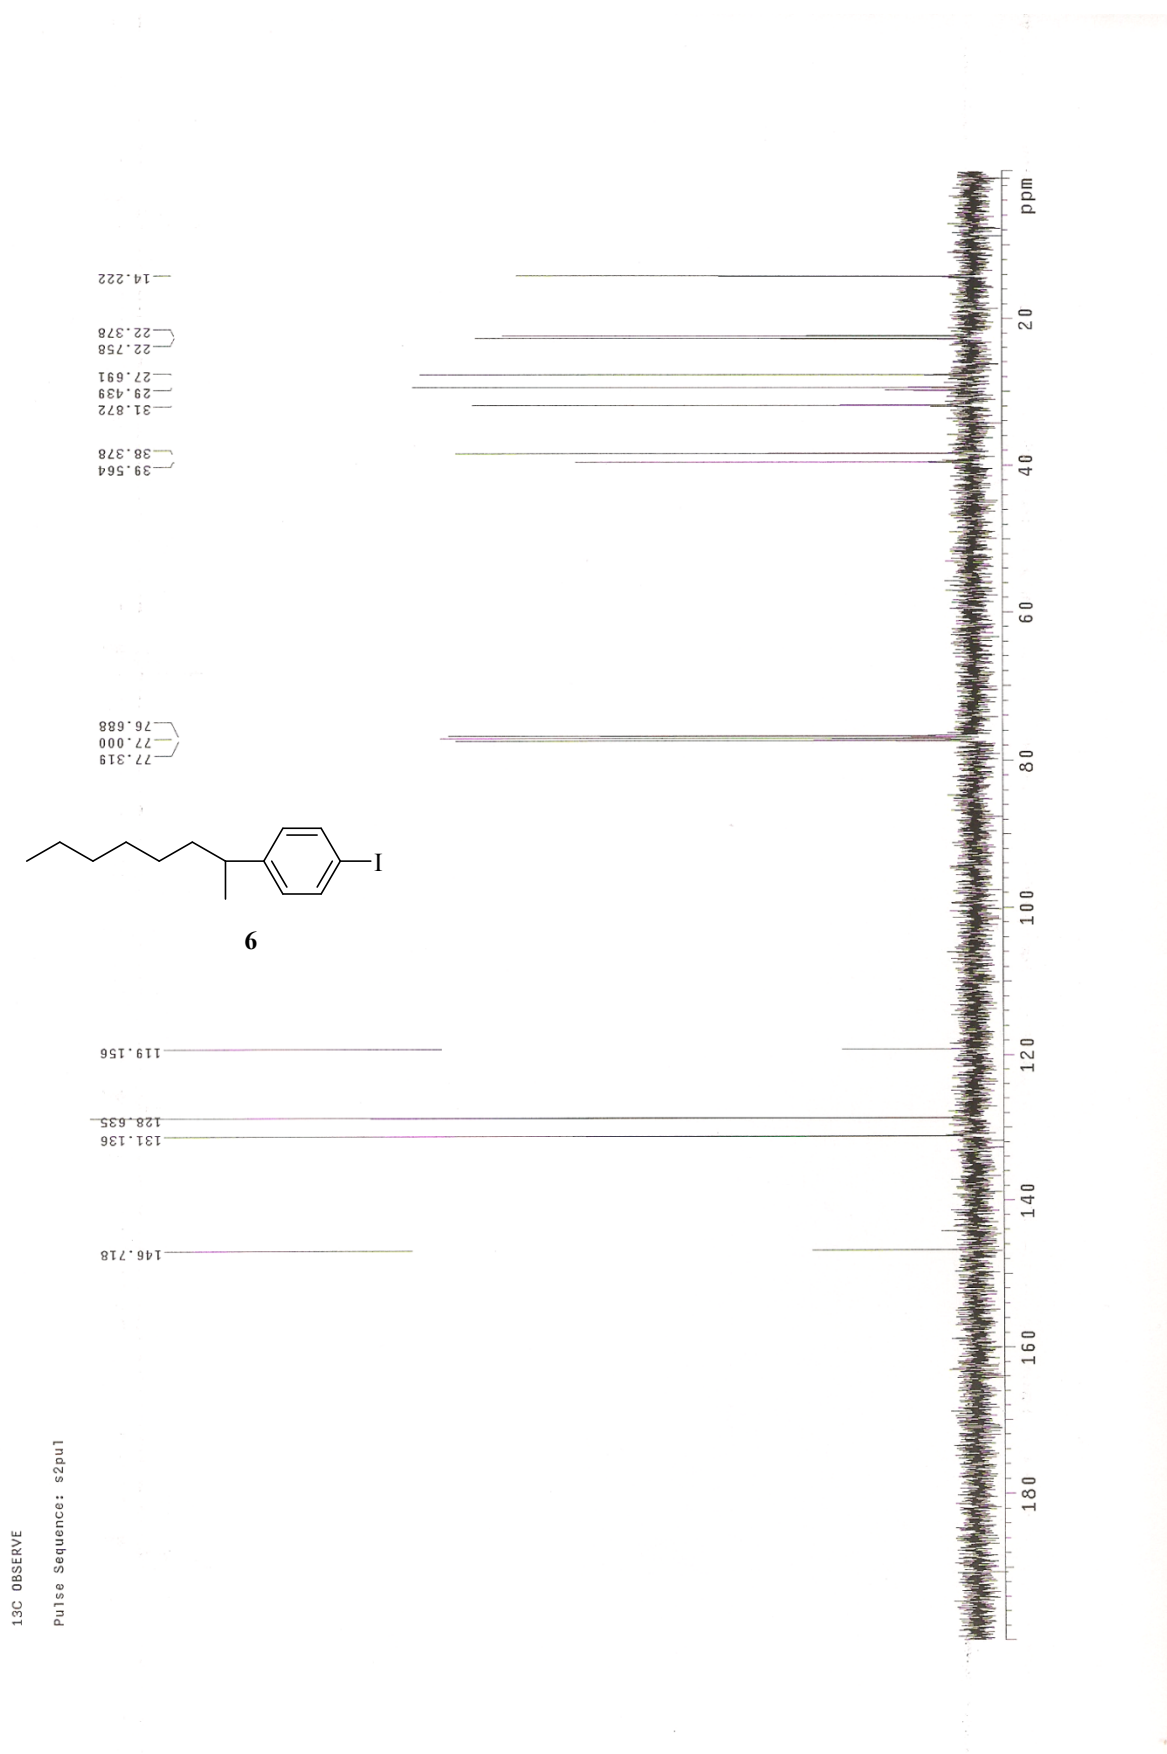

### Supporting Figure S14. <sup>1</sup>H NMR Spectrum of 7

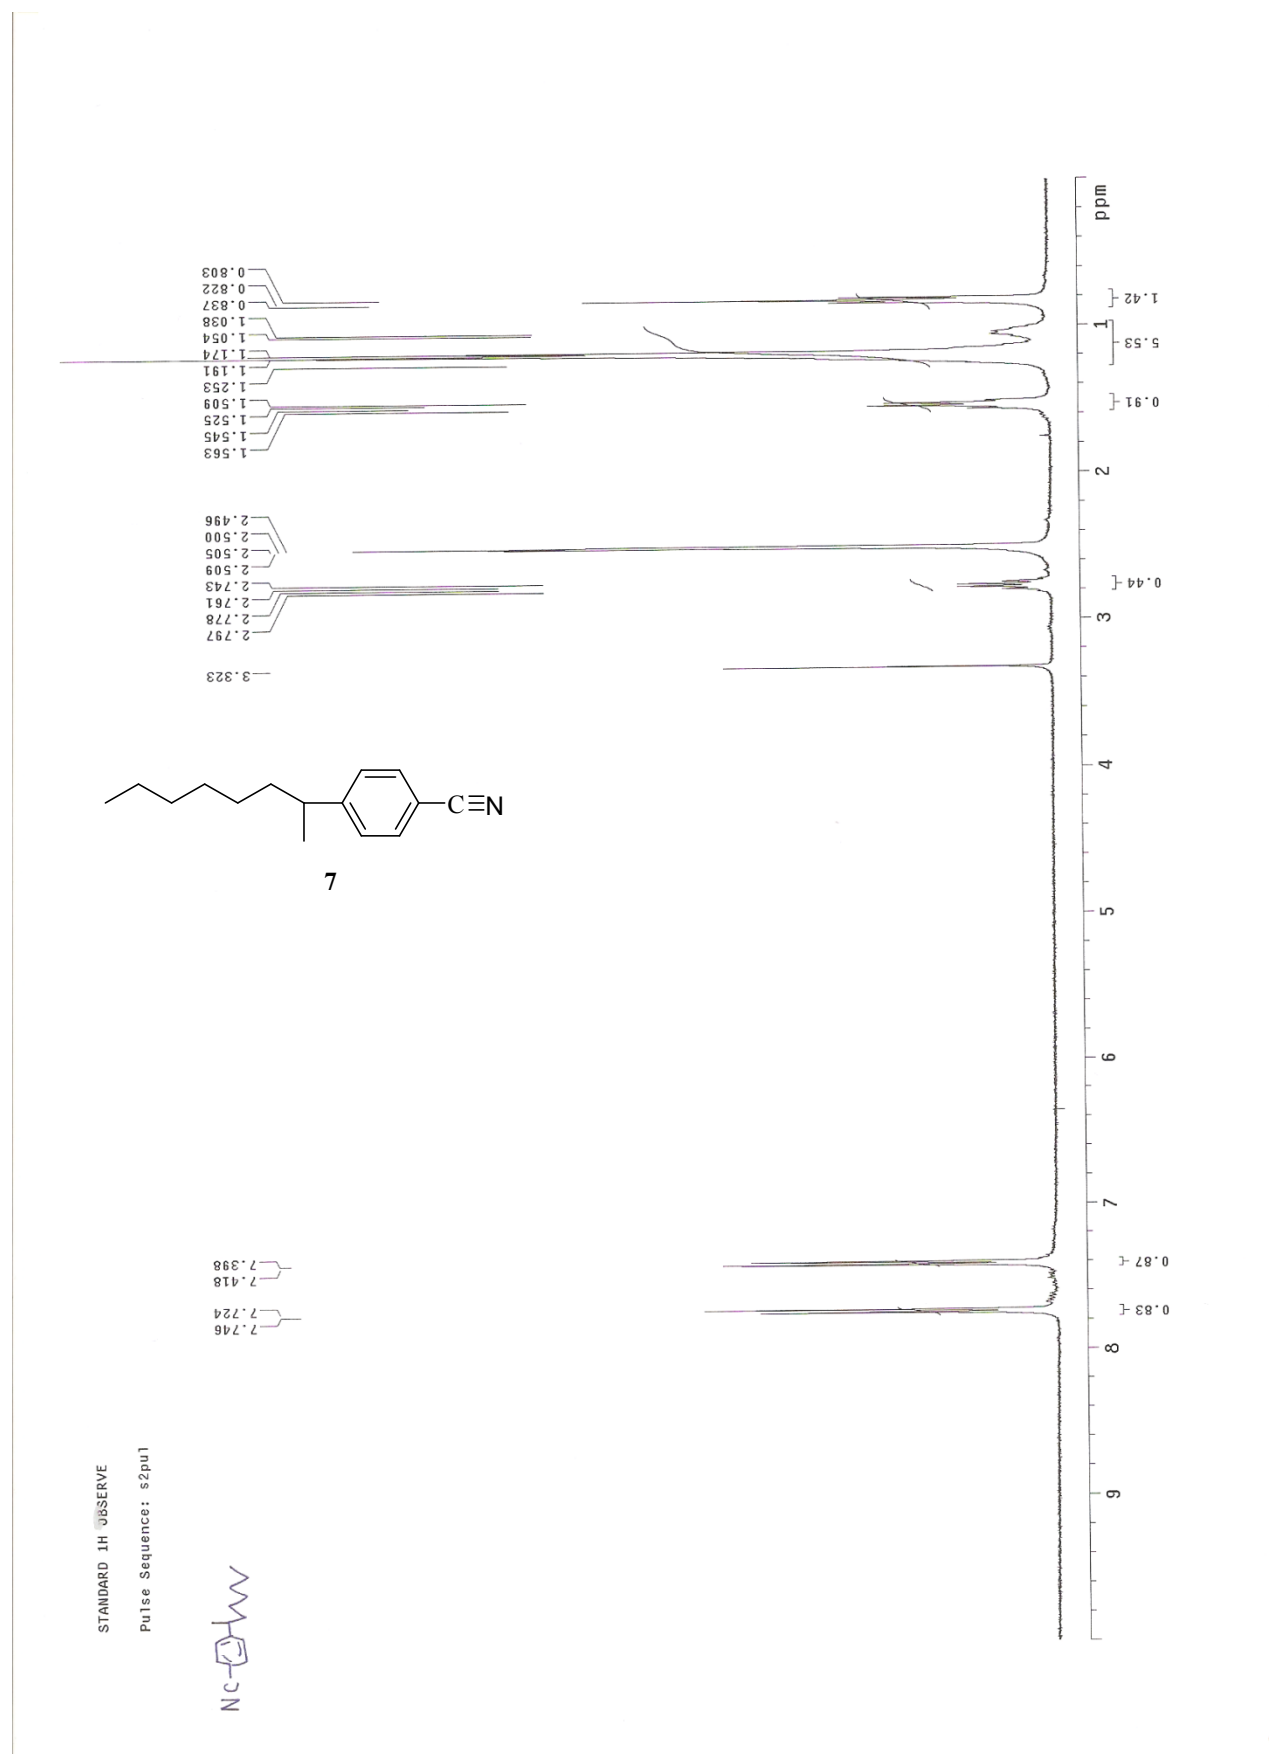



### Supporting Figure S15. <sup>13</sup>C NMR Spectrum of 7

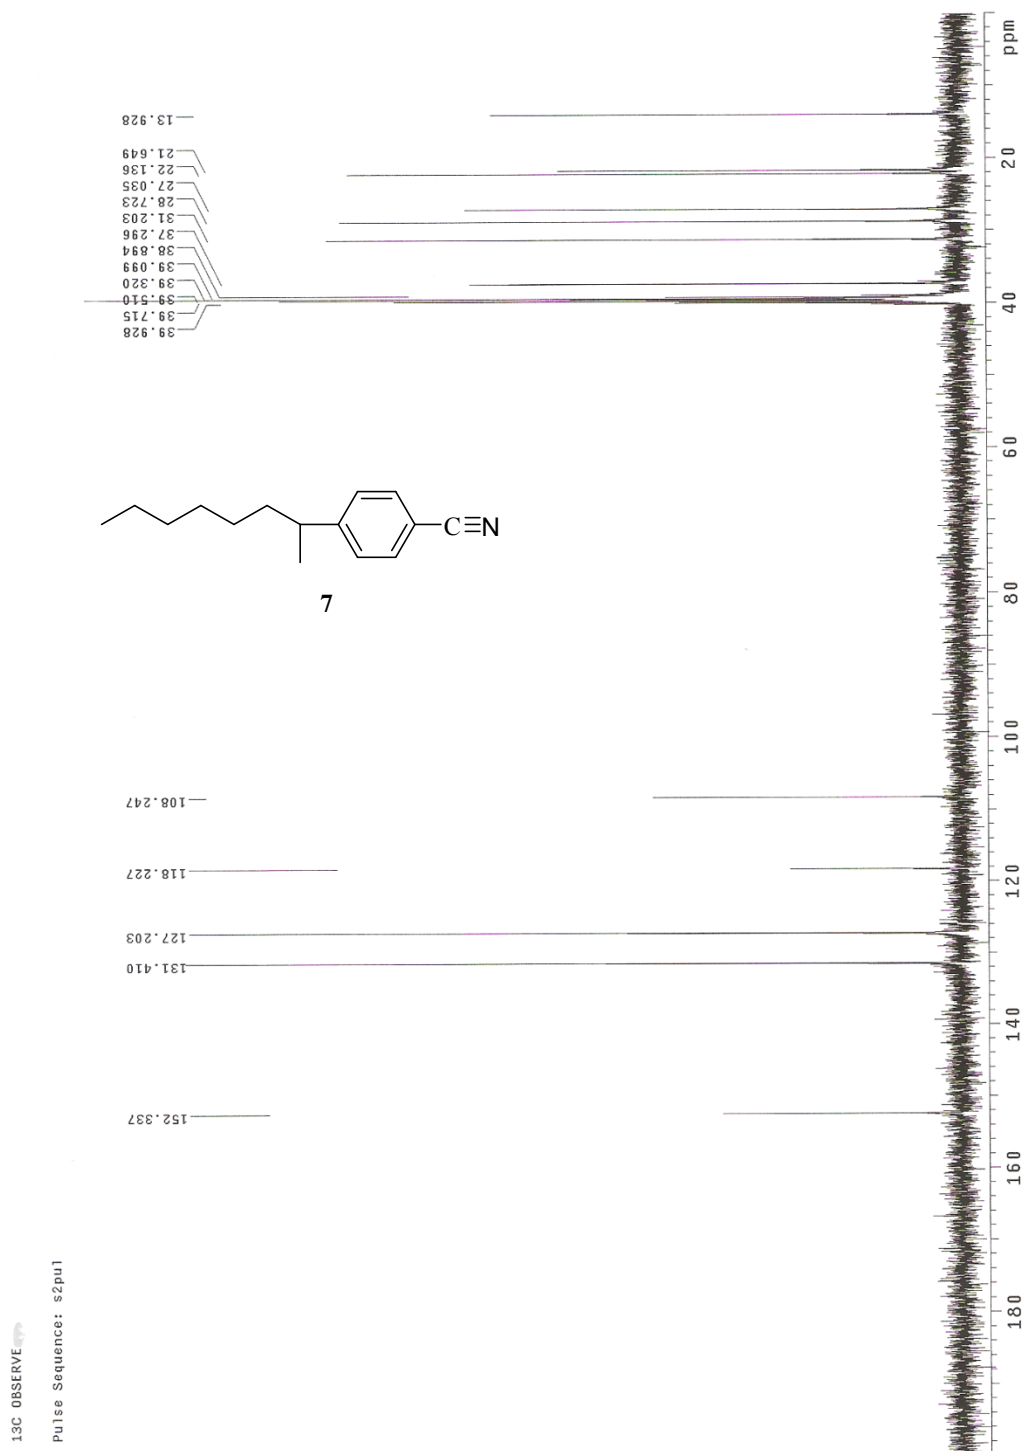

### Supporting Figure S16. <sup>1</sup>H NMR Spectrum of 8

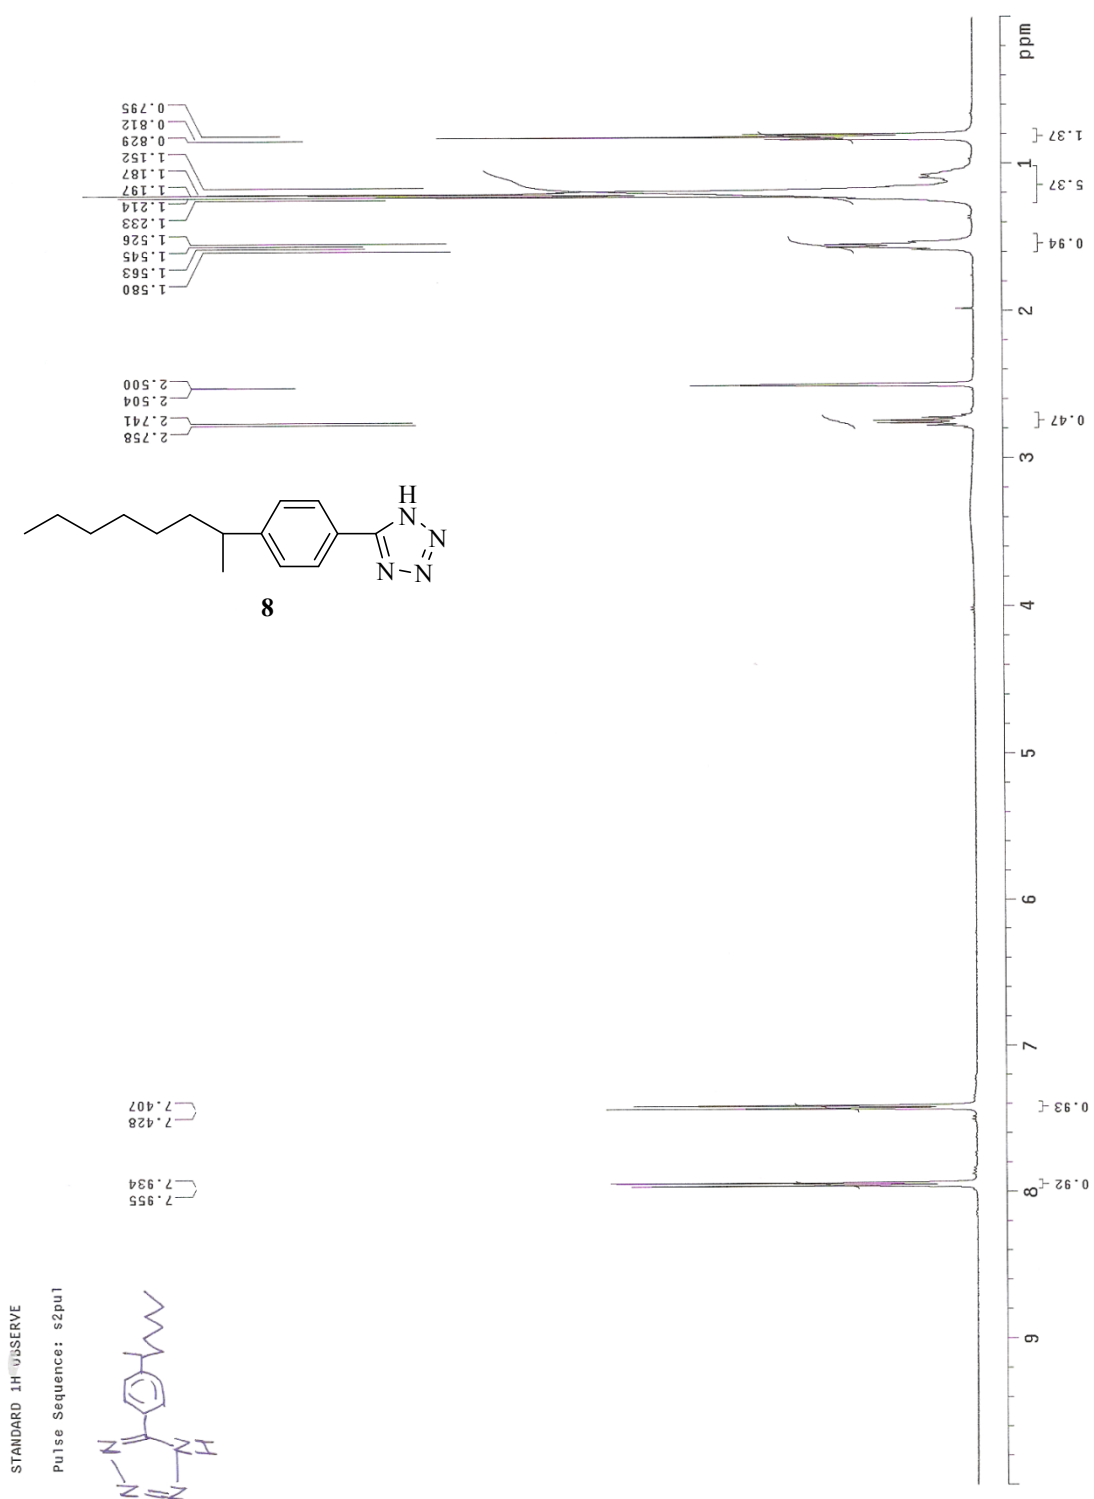

### Supporting Figure S17. $^{13}\text{C}$ NMR Spectrum of **8**

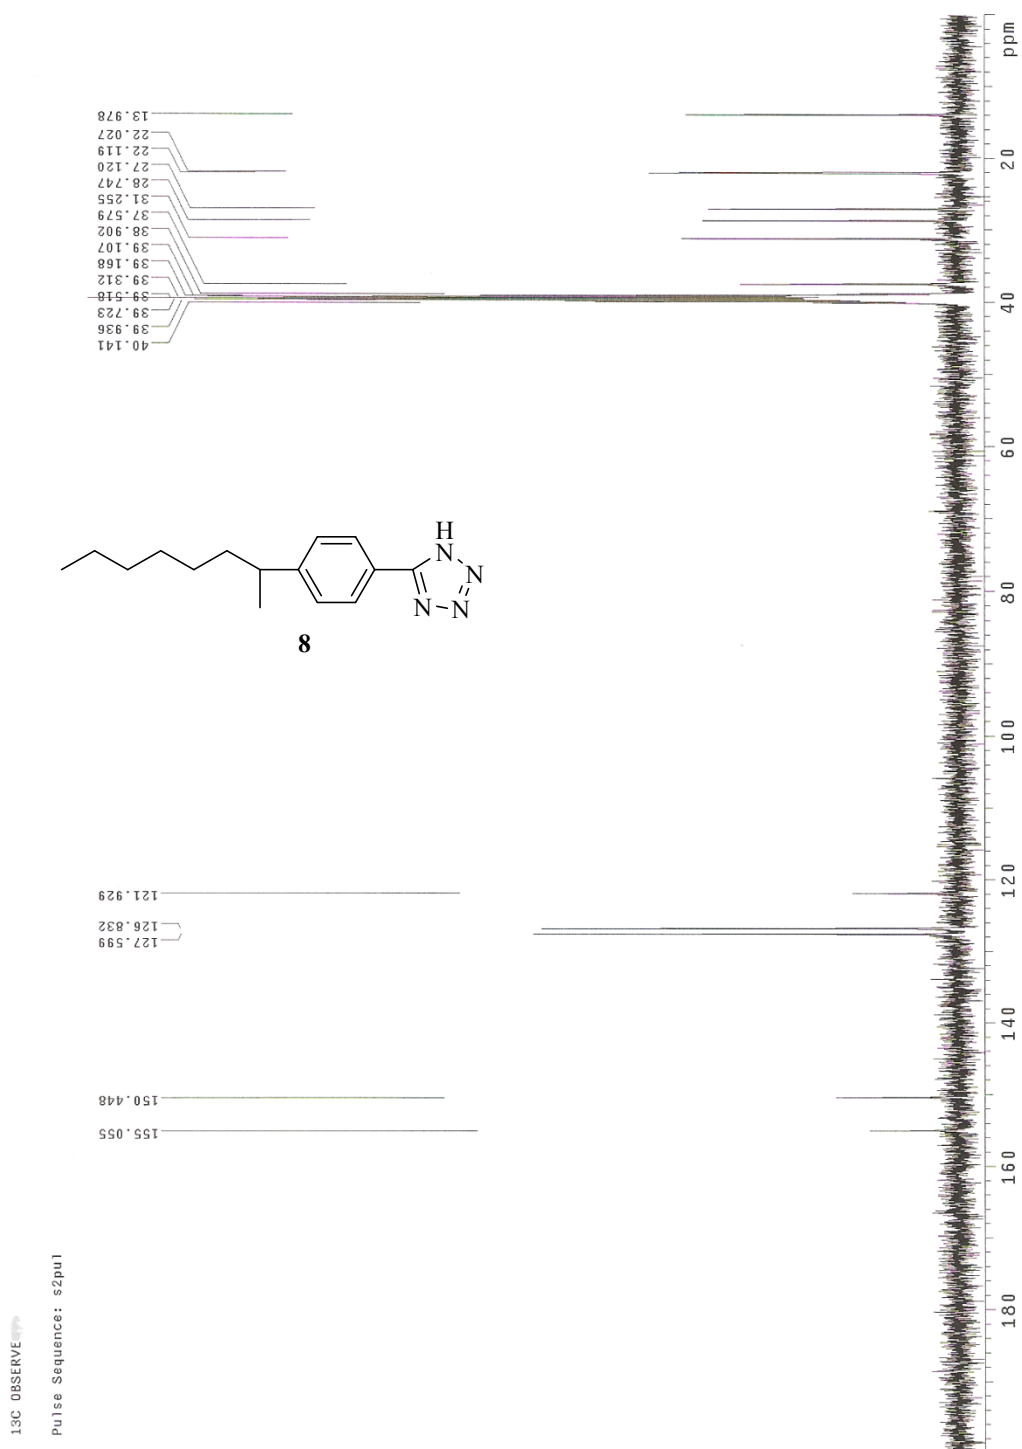

### Supporting Figure S18. <sup>1</sup>H NMR Spectrum of NOXD

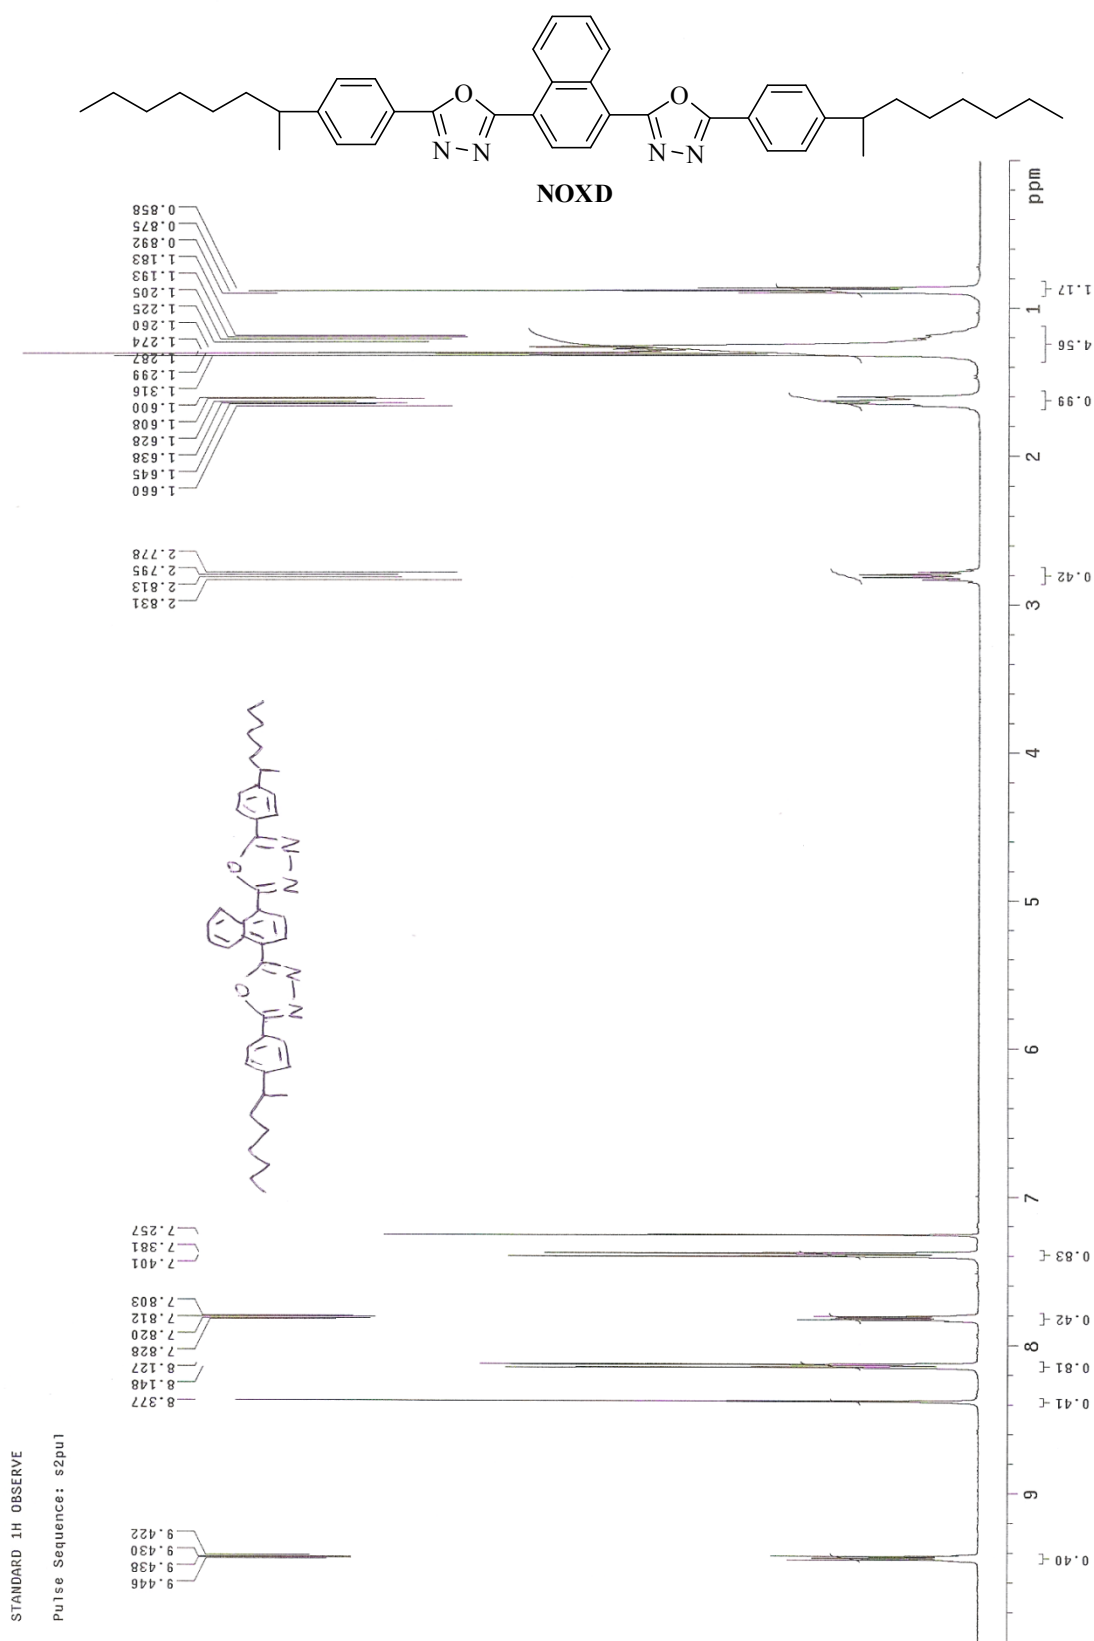

### Supporting Figure S19. <sup>13</sup>C NMR Spectrum of NOXD

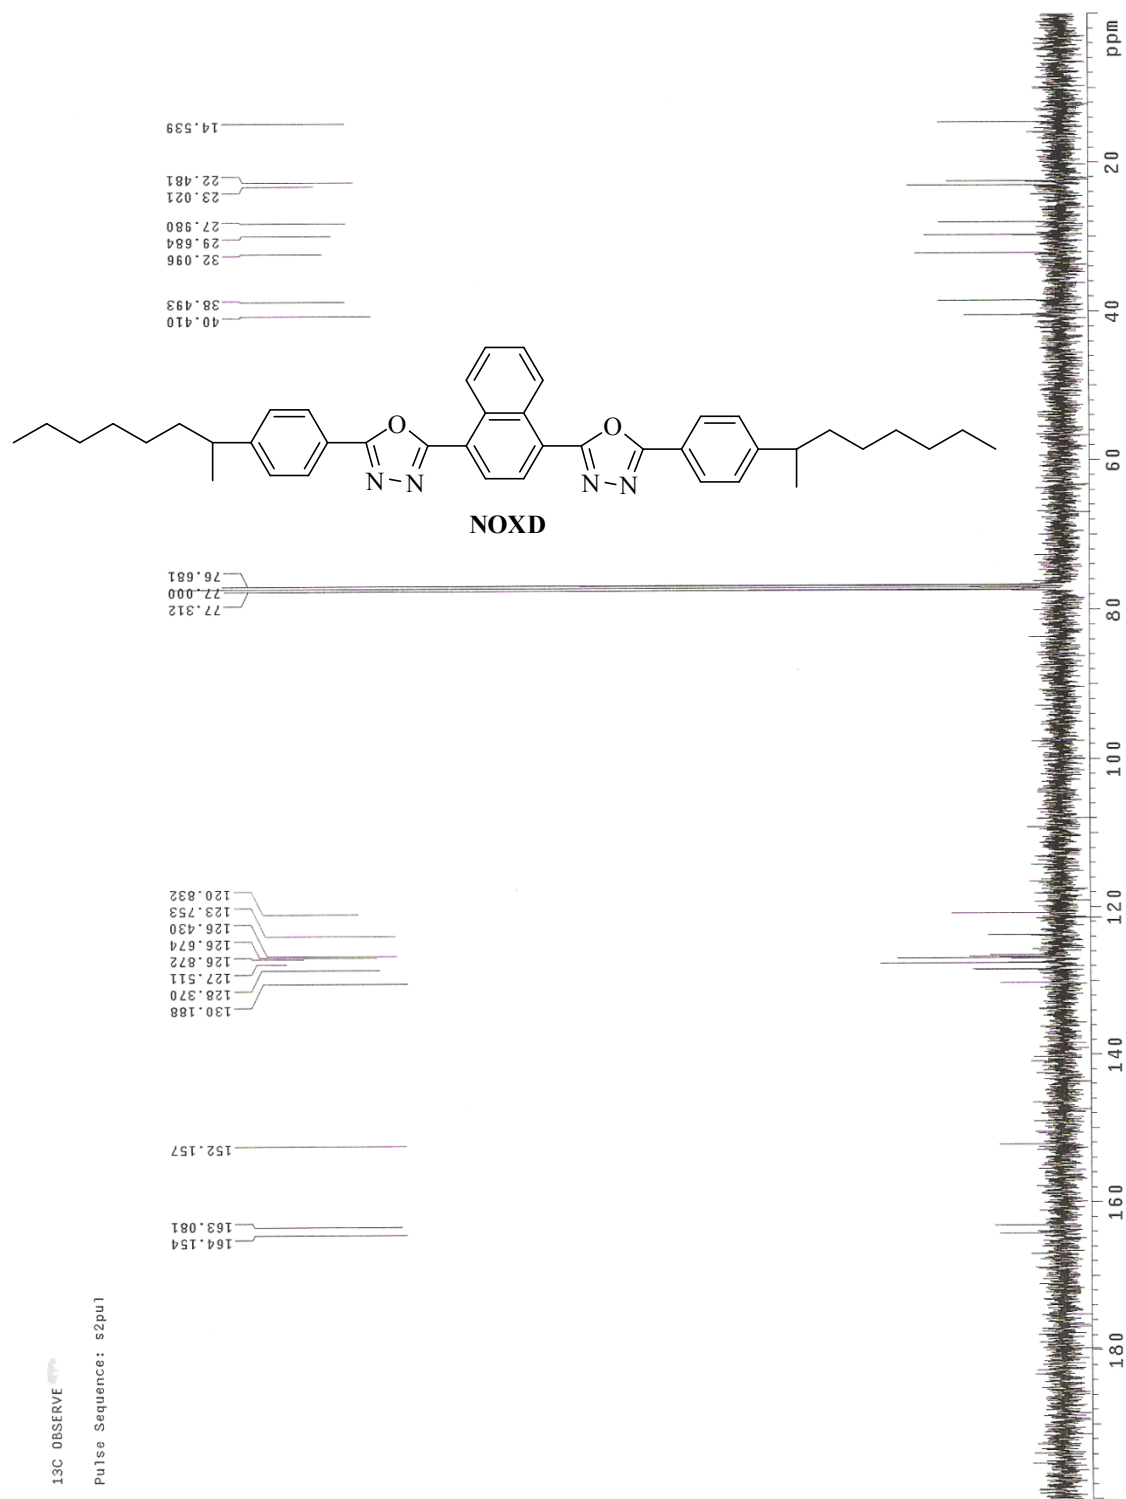

## Supporting Figure S20. Theoretical UV-Vis spectral analysis of NOXD

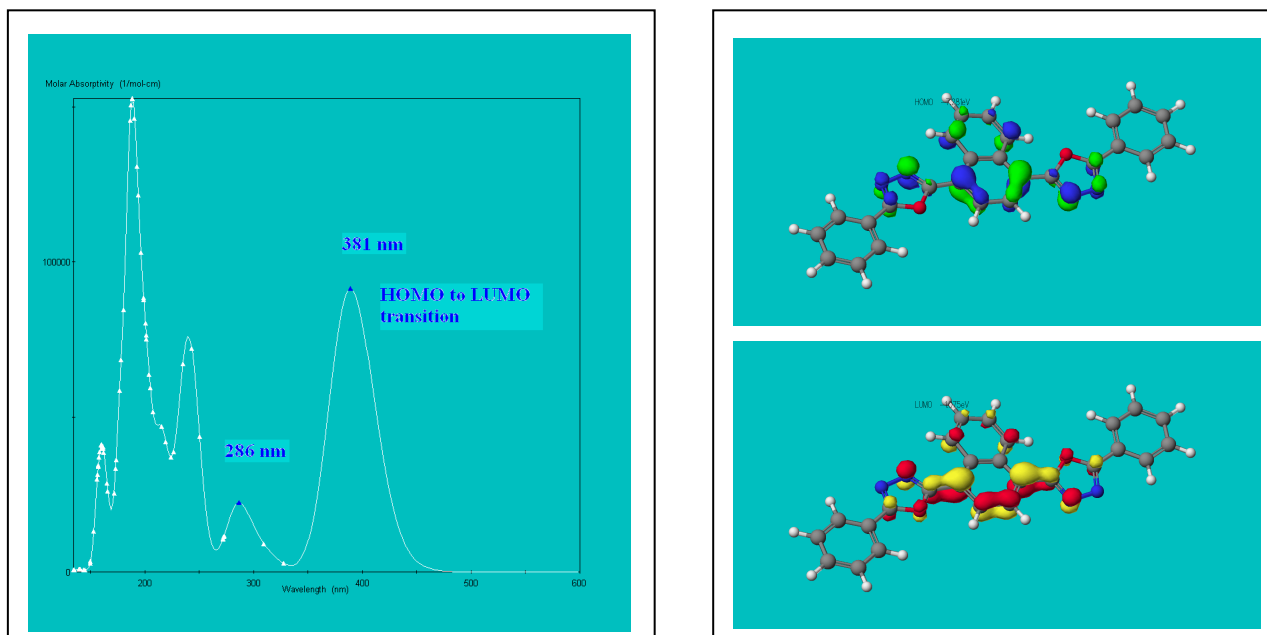

Theoretical UV-Vis spectral assignments are based on the molecular mechanics geometrical optimization and PM5/ZINDO calculations. The theoretical predictions are highly consistent with the experimental spectral data we obtained: The first transition at 360 nm is arising from HOMO/LUMO transition. The second band contains contributions from other 5 transitions.

**Supporting Figure S21.** Cyclic voltammograms of NOXD in TBAP/DMF (0.1M) under N<sub>2</sub> with a scan rate of 100 mV/s. A Glassy Carbon electrode was used as the working electrode versus a AgCl/Ag electrode as the reference electrode, and a Pt wire, as the counter electrode. The voltage was calibrated by using ferrocene as the internal standard.

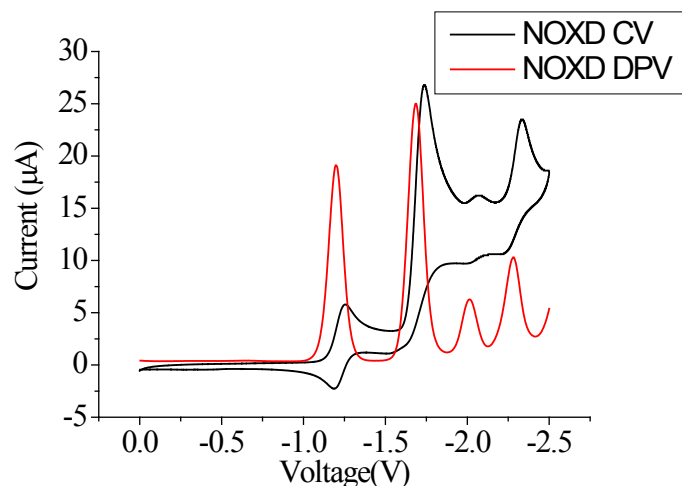

**Supporting Figure S22.** Cyclic voltammograms of PFT in TBAP/CH<sub>2</sub>Cl<sub>2</sub> (0.1M) with a scan rate of 100 mV/s.

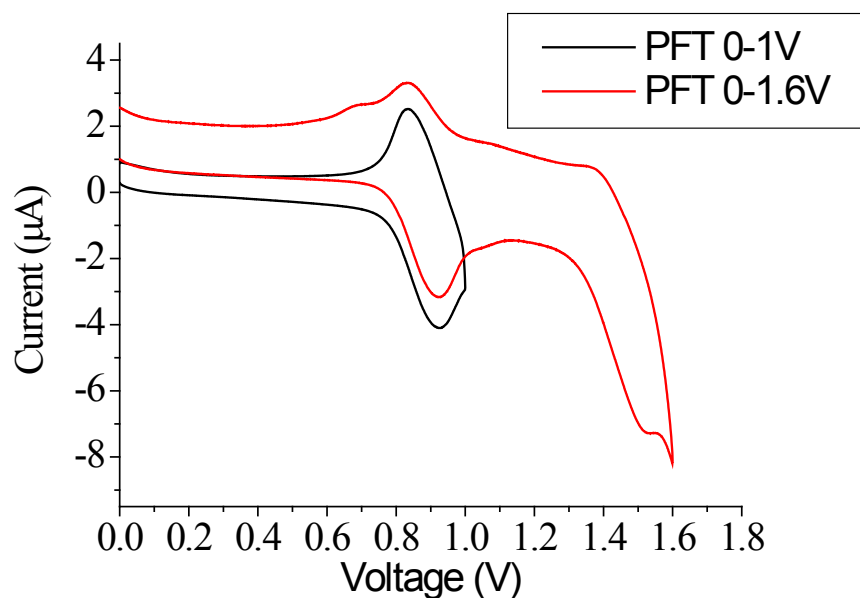

**Supporting Figure S23.** Time-resolved photoluminescence measurements of the **NOXD:PFT**.

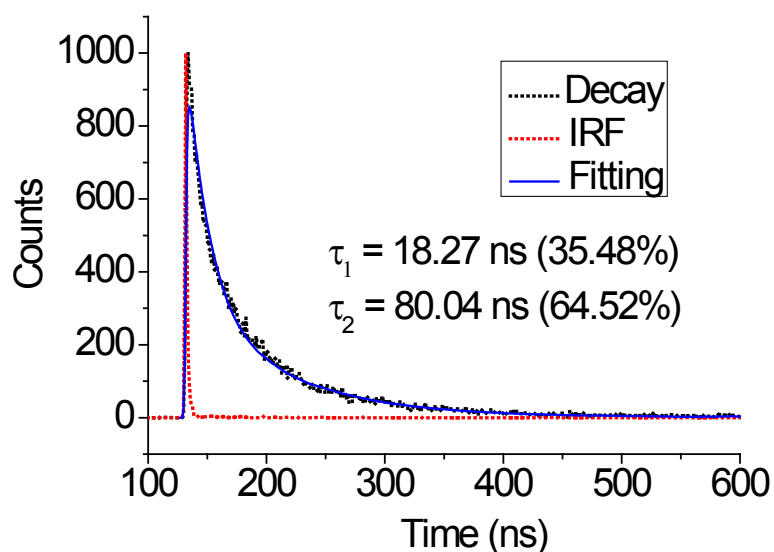

**EXPERIMENTAL PROCEDURES**

The fluorescence lifetime was detected using a time-correlated single photon counting (TCSPC) unit of an Edinburgh FLSP920 instrument. Samples were excited at 337 nm from a nitrogen pulsed flashlamp with 1 ns fwhm pulse duration transmitted through a Czerny-Turner design monochromator. Photomultiplier tube was employed as the detector. The instrument response function was profiled using a scatter solution and subsequently deconvoluted from the emission data to yield an undisturbed decay. Nonlinear least-squares fitting of the decay curves were performed with the Levenburg-Marquardt algorithm and implemented with the Edinburgh Instruments F900 software. The quality of the fits was judged by the  $\chi^2$  values and distribution of the residuals. The fitting curve based on two single-exponential decay components ( $\tau_1 \sim 18.27 \text{ ns}$ ,  $\tau_2 \sim 80.04 \text{ ns}$ ).
